# Supplementary material for: Exploring the Role of TaPLC1-2B in Heat Tolerance at Seedling and Adult Stages of Wheat through Transcriptome Analysis
Source: Int J Mol Sci. 2023 Nov 21;24(23):16583. doi: 10.3390/ijms242316583 (PMC10706844; doi:10.3390/ijms242316583)
Supplement: Supplementary file 1 [file ijms-24-16583-s001.zip]

Archive with 7 entries (7 files):
- Supplementary Figures S1-S10.pdf
- Table S1. Transcriptome quality analysis..xlsx
- Table S2. Seeding stage auxin related differentially expressed genes analysis..xlsx
- Table S3. Adult stage auxin related differentially expressed genes analysis..xlsx
- Table S4. PH vs. PHH and WH vs. WHH auxin related differentially expressed genes analysis..xlsx
- Table S5. Differential expression of HSP related genes between different groups..xlsx
- Table S6. Differential expression of HSF related genes between different groups..xlsx
