# Supplementary material for: Exploring the Role of TaPLC1-2B in Heat Tolerance at Seedling and Adult Stages of Wheat through Transcriptome Analysis
Source: Int J Mol Sci. 2023 Nov 21;24(23):16583. doi: 10.3390/ijms242316583 (PMC10706844; doi:10.3390/ijms242316583)
Supplement: Supplementary file 1 [file ijms-24-16583-s001.zip › Table S1. Transcriptome quality analysis..xlsx]

## Sheet: Table S1
Supplementary Table S1.Transcriptome quality analysis
Samples	Clean reads	Clean bases	GC Content	%≥Q30
PCH1	44673557	13337888016	0.5337	0.9503
PCH2	43179569	12903803770	0.5339	0.9448
PCH3	38400652	11474339636	0.5367	0.95
PHH1	37859835	11316682536	0.5441	0.9479
PHH2	36567707	10929603520	0.5381	0.9462
PHH3	42220187	12612817674	0.5361	0.9519
WCH1	39549353	11826834236	0.5376	0.9487
WCH2	32950300	9848284838	0.553	0.9466
WCH3	35858812	10715005314	0.5418	0.9465
WHH1	39891029	11929723038	0.5383	0.9438
WHH2	39658832	11848336634	0.5452	0.9459
WHH3	38267296	11445959524	0.5357	0.9448
