# Supplementary material for: Exploring the Role of TaPLC1-2B in Heat Tolerance at Seedling and Adult Stages of Wheat through Transcriptome Analysis
Source: Int J Mol Sci. 2023 Nov 21;24(23):16583. doi: 10.3390/ijms242316583 (PMC10706844; doi:10.3390/ijms242316583)
Supplement: Supplementary file 1 [file ijms-24-16583-s001.zip › Table S2. Seeding stage auxin related differentially expressed genes analysis..xlsx]

## Sheet: PC vs. PH
Gene ID	PC1_Count	PC2_Count	PC3_Count	PH3_Count	PH1_Count	PH2_Count	PC1_FPKM	PC2_FPKM	PC3_FPKM	PH3_FPKM	PH1_FPKM	PH2_FPKM	log2FC	regulated
TraesCS7D03G0188900	4787	3326	2468	332	255	247	80.1196	66.8814	39.4817	5.47037	4.30949	5.18952	-2.63969	down
TraesCS4A03G0646200	107868	100963	72161	17947	13443	12231	1768.99	1989.26	1131.04	290.133	222.994	252.248	-1.68143	down
TraesCS4A03G0363700	15963	14860	12801	3640	3452	3024	188.458	210.763	144.432	42.3582	41.2218	44.889	-1.08526	down
TraesCS1A03G0483200	50	49	81	224	106	150	1.76696	2.04444	2.72182	7.77295	3.77696	6.62846	2.45184	up
TraesCS6B03G1017100	93	88	212	20	13	14	3.37714	3.85363	7.37256	0.695918	0.459194	0.623627	-2.01912	down
TraesCS5A03G0552400	1592	1147	1226	125	82	109	18.3094	15.8372	13.469	1.41307	0.951963	1.57161	-2.60169	down
TraesCS3B03G0411700	896	667	449	188	111	133	4.65937	4.16425	2.23106	0.96157	0.581338	0.864626	-1.197	down
TraesCS5B03G0560700	6461	4781	4799	609	320	533	73.5828	65.4204	52.2402	6.83193	3.68284	7.62507	-2.3986	down
TraesCS4A03G0963000	5855	4361	3048	624	437	446	100.604	90.0159	50.0473	10.5658	7.58422	9.62283	-2.11714	down
TraesCS4B03G0155100	117119	93684	49674	17454	17836	14267	1560.69	1499.88	632.654	229.28	240.406	239.085	-1.37972	down
TraesCS7D03G0189100	7313	5777	6470	716	523	419	107.031	101.589	90.5099	10.3234	7.72955	7.70024	-2.54981	down
TraesCS3B03G0796700	1410	995	1101	259	245	172	11.155	9.4563	8.32517	2.02024	1.95503	1.71049	-1.35595	down
TraesCS7A03G0146600	1045	862	540	161	104	168	7.21946	6.26624	3.12088	0.960089	0.635319	1.4579	-1.44499	down
TraesCS5D03G0519500	1984	1333	1225	107	67	85	63.8376	51.5433	37.6749	3.36513	2.173	3.41979	-3.09259	down
TraesCS6A03G0852000	218	166	706	2033	1831	807	2.80622	2.55599	8.67594	25.7915	23.8427	13.0615	3.11182	up
TraesCS7A03G0209400	5576	4097	1937	347	273	283	104.102	91.8872	34.56	6.37907	5.14158	6.64003	-2.66064	down
TraesCS4D03G0130800	133615	124022	83440	24717	21434	20118	2459.29	2742.52	1467.81	448.471	399.044	465.658	-1.34557	down
TraesCS4A03G0963200	14515	12446	9827	1619	1736	1536	360.987	480.392	306.36	51.1026	55.6752	48.021	-1.87845	down
TraesCS5A03G0098100	34	7	28	152	166	90	0.107719	0.0263	0.086315	0.483845	0.544084	0.366241	3.60448	up
TraesCS7B03G0977400	3273	2364	2191	527	487	388	12.2407	10.6216	7.83128	1.94127	1.83967	1.82531	-1.45836	down
TraesCS7B03G0929000	1452	1178	1093	195	92	108	6.97509	6.40265	4.73268	0.869512	0.41472	0.609983	-2.22807	down
TraesCS3A03G1027200	8553	7433	6499	1700	1649	1241	36.79	38.4106	26.716	7.20504	7.1727	6.7124	-1.27951	down
TraesCS1D03G0402200	610	430	475	80	66	71	2.71261	2.2979	2.01751	0.349838	0.2935	0.394699	-1.7613	down
TraesCS3D03G0670800	293	301	200	54	70	64	1.59471	1.96814	1.04018	0.290024	0.380906	0.43312	-1.04761	down
TraesCS2D03G0861200	958	831	524	84	47	59	4.95161	5.15929	2.58472	0.428077	0.244124	0.37928	-2.59158	down
TraesCS5B03G0861500	801	634	783	12	3	15	23.6358	22.4762	22.0843	0.328503	0.059763	0.536968	-5.14989	down
TraesCS6D03G0682500	280	326	301	53	20	23	2.04665	2.86224	2.10232	0.37934	0.141234	0.203483	-2.25612	down
TraesCS7D03G1098600	267	188	145	3398	3318	3771	2.4667	2.07817	1.27657	30.9816	31.0396	43.8531	5.18763	up
TraesCS5B03G0264300	184	135	110	190	186	193	2.27934	2.00362	1.2929	2.31903	2.33108	2.99545	1.45499	up
TraesCS7A03G0380000	336	302	255	259	356	271	1.05598	1.14106	0.766383	0.801194	1.13122	1.07122	1.0205	up
TraesCS7D03G1033600	3141	3197	2136	346	248	199	13.287	16.2508	8.6377	1.44008	1.05875	1.05404	-2.4304	down
TraesCS3D03G0956500	12630	10249	9733	2300	2428	2002	52.4119	51.0946	38.6026	9.40562	10.1905	10.4433	-1.24554	down
TraesCS1D03G0455800	29	18	36	167	144	101	1.01935	0.731412	1.19951	5.79234	5.12392	4.44663	3.33391	up
TraesCS3A03G0968000	86	65	105	6	0	0	2.60123	2.35083	3.04486	0.174268	0	0	-4.43786	down
TraesCS7A03G1121400	2709	2282	2338	337	359	261	8.00216	8.09885	6.60141	0.979033	1.07008	0.967581	-1.9169	down
TraesCS5D03G0785000	334	278	340	16	7	19	9.85495	9.8352	9.57879	0.449264	0.199011	0.699942	-3.44273	down
TraesCS1B03G0514800	398	270	247	30	13	41	1.71907	1.39911	1.01921	0.127017	0.056342	0.219432	-2.34975	down
TraesCS7D03G1068400	3106	2479	2490	528	322	354	14.8389	14.2039	11.349	2.48039	1.55313	2.11719	-1.72228	down
TraesCS1A03G0420500	447	356	267	70	29	66	2.79496	2.67308	1.59663	0.428028	0.179363	0.514391	-1.64133	down
TraesCS2B03G1012000	305	429	198	20	10	34	1.33165	2.25352	0.823644	0.086216	0.043376	0.182944	-2.79455	down
TraesCS5D03G0114800	14	4	8	254	253	154	0.042857	0.01507	0.022001	0.789375	0.808565	0.609861	5.68628	up
TraesCS7A03G1082400	506	475	481	36	18	16	2.30704	2.60294	2.0987	0.159214	0.080758	0.088272	-3.38604	down
TraesCS6B03G0751300	23	43	79	170	146	73	0.428158	0.960772	1.41567	3.16638	2.78091	1.73336	2.40568	up
TraesCS5A03G0562600	121	141	128	32	24	20	0.881321	1.23298	0.885729	0.228156	0.175933	0.174148	-1.35843	down
TraesCS6D03G0220900	129	121	248	201	242	139	0.38015	0.428798	0.698336	0.583127	0.722152	0.514218	1.24947	up
TraesCS5B03G0104300	32	19	25	96	122	64	0.10037	0.070225	0.074372	0.301241	0.3938	0.253306	2.90791	up
TraesCS1D03G0940900	74	65	171	16	18	11	0.314917	0.335634	0.700071	0.064528	0.075615	0.054711	-1.74703	down
TraesCS2A03G0921500	589	662	384	47	14	19	2.78941	3.76498	1.73673	0.218669	0.065521	0.107689	-3.38548	down
TraesCS7A03G0930800	478	438	441	52	24	55	6.21165	6.82906	5.47834	0.659364	0.305521	0.890218	-2.3103	down
TraesCS7B03G0900400	131	143	179	420	688	248	0.781823	1.02172	1.02189	2.47255	4.1598	1.86451	2.56678	up
TraesCS1A03G0846400	608	421	805	66	59	40	5.73539	4.76576	7.25512	0.61164	0.556556	0.468591	-2.44524	down
TraesCS3D03G1022300	397	289	358	82	85	63	4.96927	4.34004	4.27988	1.00389	1.07529	0.98907	-1.15403	down
TraesCS3A03G0699200	1557	997	3165	340	409	171	12.3185	9.47117	23.9327	2.64595	3.26907	1.69324	-1.61643	down
TraesCS3D03G0640400	1923	1545	2608	426	476	238	13.6083	13.1367	17.6399	2.96847	3.40139	2.11132	-1.40606	down

## Sheet: WC vs. WH
Gene ID	WC1_Count	WC2_Count	WC3_Count	WH3_Count	WH1_Count	WH2_Count	WC1_FPKM	WC2_FPKM	WC3_FPKM	WH3_FPKM	WH1_FPKM	WH2_FPKM	log2FC	regulated
TraesCS7B03G0977400	1714	2090	2079	439	649	314	7.2444	7.94473	9.83009	1.87405	2.28439	1.41331	-1.24068	down
TraesCS5D03G0986600	712	528	79	1	2	2	9.11689	6.08061	1.12611	0.010784	0.021347	0.025268	-7.12535	down
TraesCS7B03G0929000	2162	1806	1672	102	124	93	11.2294	8.30574	9.75488	0.521981	0.523899	0.504582	-3.28263	down
TraesCS1B03G0952700	344	390	193	65	69	45	1.93005	1.9705	1.20756	0.363773	0.322751	0.263509	-1.47756	down
TraesCS3A03G1027200	5415	7991	7549	1742	1918	1554	26.3227	34.9409	41.059	8.55679	7.76901	8.04271	-1.13507	down
TraesCS1D03G0402200	601	549	459	59	52	67	3.02358	2.4832	2.5789	0.296551	0.214003	0.355086	-2.27566	down
TraesCS6B03G1017600	589	678	358	20	69	24	23.6911	24.5672	16.1209	0.779767	2.31427	1.01741	-3.02229	down
TraesCS2D03G0861200	556	586	691	41	63	45	3.2443	3.07829	4.51449	0.241288	0.302904	0.278805	-2.78155	down
TraesCS1D03G0192400	125	131	86	13	30	6	2.35706	2.21855	1.8059	0.241539	0.461879	0.115319	-1.99173	down
TraesCS5B03G0861500	487	257	197	15	3	9	16.2464	7.69085	7.33857	0.50251	0.055659	0.297893	-4.19154	down
TraesCS6A03G0622800	214	287	226	20	27	67	3.94665	4.76544	4.67003	0.357051	0.41325	1.3184	-1.73158	down
TraesCS6D03G0682500	441	900	455	37	27	28	3.63629	6.68705	4.19745	0.306904	0.185501	0.239972	-3.35532	down
TraesCS7B03G0998500	866	305	286	13	39	52	13.0551	4.13236	4.82257	0.186482	0.479023	0.832971	-2.93383	down
TraesCS7D03G1098600	148	133	168	3637	4103	3730	1.53785	1.25038	1.96316	38.415	35.74	41.5055	5.53662	up
TraesCS5B03G0264300	159	99	63	89	209	128	2.22186	1.23852	0.986503	1.24583	2.42985	1.90872	1.24987	up
TraesCS4D03G0024100	288	288	453	22	2	9	14.7678	13.2824	25.975	1.13111	0.061873	0.458178	-4.04942	down
TraesCS6D03G0720300	301	407	268	4	33	5	5.37915	6.55819	5.35589	0.072443	0.488365	0.085228	-3.77044	down
TraesCS1A03G0846400	130	201	212	57	26	24	1.3777	1.92615	2.52915	0.609317	0.22624	0.269079	-1.44682	down
TraesCS5D03G0528400	240	260	142	13	9	9	2.10336	2.04997	1.38887	0.107511	0.06297	0.08081	-3.46354	down
TraesCS6D03G0873300	798	672	419	157	175	132	8.51924	6.45011	5.00099	1.68438	1.55669	1.49551	-1.14053	down
TraesCS3D03G0258900	1070	751	572	236	171	172	29.4638	18.5945	17.6089	6.55586	3.90254	5.0338	-1.14511	down
TraesCS3A03G0265900	3722	3039	2381	1163	693	549	43.7089	32.1025	31.2818	13.7969	6.77682	6.85843	-1.0255	down
TraesCS5B03G0561300	361	240	85	4	2	3	5.59298	3.3401	1.45999	0.059448	0.014822	0.048323	-5.33235	down
TraesCS7D03G1033600	4449	3653	3186	177	215	184	21.2736	15.7095	17.045	0.850587	0.854307	0.932676	-3.42091	down
TraesCS3D03G0956500	8817	12619	10484	2197	2497	2165	41.3489	53.2332	55.0144	10.4103	9.75804	10.8068	-1.33554	down
TraesCS1D03G0797500	168	214	114	35	37	45	0.891319	1.02473	0.677952	0.183489	0.162849	0.252455	-1.1629	down
TraesCS6D03G0720400	182	216	127	6	22	3	7.50573	8.01042	5.86245	0.216805	0.729516	0.127258	-3.27844	down
TraesCS5B03G1094700	1016	890	518	48	100	55	13.0169	10.2573	7.42376	0.621098	1.06808	0.743978	-2.7257	down
TraesCS3A03G0968000	173	217	166	0	6	4	5.90739	6.69834	6.36976	0	0.151459	0.124512	-4.94388	down
TraesCS7A03G1121400	963	1942	1714	326	361	232	3.2137	5.83069	6.40277	1.09682	1.00373	0.823766	-1.46381	down
TraesCS6B03G0760600	79	75	63	0	0	7	0.462329	0.395764	0.412398	0	0	0.037715	-3.9904	down
TraesCS5D03G0785000	219	102	73	6	1	12	7.29088	3.06	2.71647	0.169828	0.025788	0.401219	-3.40869	down
TraesCS6D03G0720000	183	158	96	15	21	12	2.75581	2.1332	1.61083	0.225412	0.262569	0.188962	-2.31827	down
TraesCS1B03G0514800	389	339	305	46	38	56	1.8986	1.48828	1.66485	0.226516	0.153696	0.287914	-1.97975	down
TraesCS2A03G0934600	289	105	117	17	46	23	5.3529	1.74592	2.4259	0.311091	0.711321	0.447911	-1.76822	down
TraesCS7D03G1068400	1284	1846	1824	411	310	239	6.93005	8.96485	10.9627	2.25125	1.39825	1.36148	-1.4875	down
TraesCS6A03G0851700	302	312	192	13	30	37	11.8495	10.9994	8.42916	0.483343	0.950452	1.51961	-2.43439	down
TraesCS1A03G0420500	358	380	442	68	46	53	2.53093	2.41548	3.49132	0.480792	0.265761	0.392101	-1.93629	down
TraesCS2D03G0873500	392	273	152	28	36	18	11.6927	7.31662	5.05771	0.818402	0.888059	0.551267	-2.4524	down
TraesCS2B03G1012000	292	439	391	8	22	16	1.44018	1.94813	2.15749	0.039789	0.088209	0.08142	-3.75816	down
TraesCS3A03G0699200	2702	2181	1831	538	406	412	24.1634	17.5398	18.3183	4.85891	3.02037	3.914	-1.40919	down
TraesCS1A03G0201000	327	279	129	52	77	48	5.52675	4.24365	2.44432	0.882708	1.08728	0.853978	-1.17601	down
TraesCS1A03G0702700	39	46	62	50	97	113	0.382467	0.40716	0.672313	0.497158	0.793899	1.1777	1.68218	up
TraesCS5D03G0520100	105	104	60	8	8	19	3.54408	3.1632	2.25477	0.262271	0.219707	0.661487	-2.0017	down
TraesCS7D03G0896900	507	624	508	87	29	43	18.7154	20.7236	20.9572	3.23458	0.876022	1.67103	-2.43102	down
TraesCS5D03G0114800	3	13	8	252	355	260	0.008982	0.041467	0.031055	0.908806	1.05549	0.986167	6.05404	up
TraesCS7A03G1082400	1040	1278	960	29	18	20	5.36549	5.92958	5.53949	0.147262	0.074523	0.109148	-4.71251	down
TraesCS6B03G0751300	394	291	289	54	44	81	8.40575	5.58215	6.89946	1.16023	0.771924	1.83775	-1.53137	down
TraesCS3D03G0640400	2724	2248	2063	572	439	392	21.7843	16.1733	18.4614	4.62091	2.92633	3.33283	-1.43847	down
TraesCS5A03G0562600	291	205	196	28	22	30	2.39191	1.5114	1.7983	0.229997	0.146646	0.261079	-2.21908	down
TraesCS6A03G0851500	132	135	79	18	10	2	2.16853	1.99018	1.44353	0.29856	0.124863	0.034911	-2.63877	down
TraesCS5B03G0104300	12	34	18	72	231	85	0.041578	0.107592	0.071463	0.262395	0.69433	0.326085	3.42283	up
TraesCS6D03G0720200	75	74	70	8	8	6	1.35791	1.19995	1.41624	0.129809	0.116579	0.099405	-2.45011	down
TraesCS2A03G0921500	580	376	594	18	23	23	3.10395	1.81024	3.55758	0.094517	0.100431	0.130872	-3.75659	down
TraesCS3D03G0903800	108	85	113	0	2	0	4.55762	3.21994	5.31634	0	0.035331	0	-6.44672	down
TraesCS2A03G0604900	278	384	479	87	118	72	1.71501	2.13286	3.30526	0.54046	0.604416	0.468724	-1.21143	down
TraesCS7A03G0930800	752	611	615	57	21	27	11.0483	8.06421	10.1087	0.845908	0.250073	0.413011	-3.32632	down

## Sheet: WC vs. PC
Gene ID	WC1_Count	WC3_Count	WC2_Count	PC1_Count	PC2_Count	PC3_Count	WC1_FPKM	WC3_FPKM	WC2_FPKM	PC1_FPKM	PC2_FPKM	PC3_FPKM	log2FC	regulated
TraesCS5D03G0986600	712	528	79	21	41	56	9.11689	6.08061	1.12611	0.230914	0.547775	0.604261	-3.54992	down
TraesCS6A03G0266900	59	92	47	155	173	344	0.190936	0.27073	0.172141	0.447703	0.601318	0.953591	1.6518	up
TraesCS1B03G0589800	113	84	75	30	4	14	5.08922	3.39643	3.74263	1.1877	0.158336	0.502559	-2.68623	down
TraesCS6B03G1017600	589	678	358	128	156	175	23.6911	24.5672	16.1209	4.54955	6.66538	5.96195	-1.92017	down
TraesCS1B03G1126300	432	506	368	170	150	174	8.54768	9.00695	8.15578	2.973	3.15485	2.90614	-1.52414	down
TraesCS6A03G0622800	214	287	226	10	10	56	3.94665	4.76544	4.67003	0.157565	0.18668	0.869118	-3.41633	down
TraesCS6D03G0682500	441	900	455	280	326	301	3.63629	6.68705	4.19745	2.04665	2.86224	2.10232	-1.06751	down
TraesCS7B03G0998500	866	305	286	13	10	43	13.0551	4.13236	4.82257	0.165943	0.150649	0.547793	-4.63284	down
TraesCS4D03G0024100	288	288	453	25	34	84	14.7678	13.2824	25.975	1.10082	1.85239	3.62817	-3.02499	down
TraesCS1A03G0846400	130	201	212	608	421	805	1.3777	1.92615	2.52915	5.73539	4.76576	7.25512	1.59656	up
TraesCS5D03G0528400	240	260	142	68	71	73	2.10336	2.04997	1.38887	0.520835	0.656353	0.536636	-1.70053	down
TraesCS5B03G0561300	361	240	85	4	22	25	5.59298	3.3401	1.45999	0.050861	0.34949	0.326633	-3.8198	down
TraesCS1D03G0797500	168	214	114	83	54	93	0.891319	1.02473	0.677952	0.387802	0.303311	0.415415	-1.22974	down
TraesCS1D03G0455800	239	337	157	29	18	36	9.52636	12.0984	7.00211	1.01935	0.731412	1.19951	-3.2562	down
TraesCS5B03G1094700	1016	890	518	130	175	58	13.0169	10.2573	7.42376	1.46857	2.37459	0.626612	-2.81083	down
TraesCS3A03G0968000	173	217	166	86	65	105	5.90739	6.69834	6.36976	2.60123	2.35083	3.04486	-1.25297	down
TraesCS6D03G0518500	84	98	88	5	3	29	1.69607	1.77128	1.97906	0.075539	0.042944	0.491141	-3.04232	down
TraesCS1B03G0973300	190	148	119	316	349	455	2.45384	1.71333	1.72111	3.60942	4.79055	4.97852	1.16773	up
TraesCS2D03G0873500	392	273	152	87	65	162	11.6927	7.31662	5.05771	2.27712	2.03694	4.07623	-1.5159	down
TraesCS5D03G0520100	105	104	60	5	6	16	3.54408	3.1632	2.25477	0.120208	0.193841	0.45612	-3.43979	down
TraesCS7A03G1082400	1040	1278	960	506	475	481	5.36549	5.92958	5.53949	2.30704	2.60294	2.0987	-1.28255	down
TraesCS6B03G0751300	394	291	289	23	43	79	8.40575	5.58215	6.89946	0.428158	0.960772	1.41567	-2.88542	down
TraesCS5B03G1256600	330	273	179	2	2	3	2.85471	2.1215	1.73567	0.014011	0.017386	0.021112	-6.92529	down
TraesCS7A03G1055500	150	283	83	52	40	79	0.995289	1.68846	0.611171	0.300838	0.278789	0.442172	-1.68095	down

## Sheet:  WH vs. PH
Gene ID	WH1_Count	WH2_Count	WH3_Count	PH3_Count	PH1_Count	PH2_Count	WH1_FPKM	WH2_FPKM	WH3_FPKM	PH3_FPKM	PH1_FPKM	PH2_FPKM	log2FC	regulated
TraesCS5A03G0098100	7	7	10	152	166	90	0.02426	0.018969	0.037466	0.483845	0.544084	0.366241	4.06074	up
TraesCS6A03G0266900	44	108	27	254	233	135	0.145665	0.293035	0.091237	0.726352	0.683455	0.490273	1.85412	up
TraesCS7D03G1225300	487	300	474	97	66	187	6.07914	3.08673	6.24185	1.03779	0.720401	2.56299	-1.79591	down
TraesCS3D03G0258900	236	171	172	539	470	386	6.55586	3.90254	5.0338	12.9327	11.5793	11.8228	1.24504	up
TraesCS7A03G1152300	146	204	126	71	78	52	1.51613	1.74789	1.37694	0.629916	0.711992	0.594127	-1.22601	down
TraesCS7A03G1152200	138	178	113	63	69	38	1.80969	1.91901	1.5585	0.704895	0.793238	0.549038	-1.33324	down
TraesCS5B03G1256600	98	124	124	0	5	0	0.857386	0.895658	1.13534	0	0.031033	0	-6.1295	down
