# Supplementary material for: Exploring the Role of TaPLC1-2B in Heat Tolerance at Seedling and Adult Stages of Wheat through Transcriptome Analysis
Source: Int J Mol Sci. 2023 Nov 21;24(23):16583. doi: 10.3390/ijms242316583 (PMC10706844; doi:10.3390/ijms242316583)
Supplement: Supplementary file 1 [file ijms-24-16583-s001.zip › Table S3. Adult stage auxin related differentially expressed genes analysis..xlsx]

## Sheet: PCH vs. PHH
Gene ID	PCH1_Count	PCH2_Count	PCH3_Count	PHH3_Count	PHH2_Count	PHH1_Count	PCH1_FPKM	PCH2_FPKM	PCH3_FPKM	PHH3_FPKM	PHH2_FPKM	PHH1_FPKM	log2FC	regulated
TraesCS5B03G1094700	55	64	34	112	91	89	0.657718	0.773164	0.453843	1.40784	1.31152	1.20885	1.39352	up
TraesCS7B03G0850100	1148	1298	1085	595	257	371	3.50161	4.0461	3.77068	1.90921	0.949728	1.28865	-1.11548	down
TraesCS1B03G1126300	506	639	437	71	52	129	9.34966	12.0853	9.19571	1.37877	1.15708	2.71736	-2.18551	down
TraesCS1D03G0797500	122	203	81	41	37	24	0.607085	1.02935	0.456916	0.214915	0.219473	0.132165	-1.51557	down
TraesCS7B03G0998500	110	73	221	392	284	289	1.54292	1.04188	3.53736	5.80213	4.85547	4.64031	1.61238	up
TraesCS2D03G0861200	125	148	56	167	188	188	0.677602	0.82117	0.346578	0.953771	1.23906	1.1673	1.21848	up
TraesCS5D03G0519500	254	408	93	44	46	39	8.62463	14.1379	3.5666	1.54042	1.87157	1.47726	-2.03529	down
TraesCS2A03G0381800	1660	1397	496	162	111	295	8.00549	6.88481	2.72515	0.817519	0.646737	1.61945	-2.14339	down
TraesCS7B03G0178700	1680	2373	804	325	264	301	5.31118	7.67796	2.89611	1.08111	1.01244	1.09665	-1.95644	down
TraesCS6A03G0622800	212	267	158	50	30	70	3.6602	4.71089	3.10368	0.906638	0.621803	1.36535	-1.62263	down
TraesCS7D03G1098600	1319	1075	1904	5867	7154	6070	12.8743	10.7268	21.173	60.287	84.7988	67.6113	2.56046	up
TraesCS7A03G0209500	84	130	70	232	202	128	1.52826	2.40831	1.44161	4.45119	4.45331	2.66018	1.44198	up
TraesCS4D03G0677000	1212	2016	530	175	51	145	19.2605	32.7536	9.60091	2.92509	0.973172	2.61851	-2.86409	down
TraesCS5D03G0876900	39	24	52	139	85	135	0.366439	0.226002	0.559467	1.39299	0.979484	1.46905	2.03343	up
TraesCS1A03G1034900	390	377	488	989	728	535	2.04651	2.02187	2.92007	5.46716	4.64171	3.20103	1.24418	up
TraesCS7D03G0188900	158	218	136	327	363	482	2.77752	3.9212	2.73048	6.06612	7.76876	9.70205	1.66891	up
TraesCS7A03G0209400	89	127	90	216	126	132	1.74472	2.54383	2.01347	4.48103	3.01292	2.9531	1.06253	up
TraesCS3B03G0303300	239	304	165	51	58	78	1.66027	2.1587	1.30638	0.367371	0.486605	0.617703	-1.43864	down
TraesCS6D03G0518500	116	88	87	17	24	22	2.17809	1.68146	1.85883	0.333337	0.528221	0.47154	-1.75379	down
TraesCS3B03G0796700	891	815	479	370	181	249	7.43524	6.95621	4.556	3.24974	1.82957	2.36503	-1.00539	down
TraesCS3D03G0640400	1486	913	1130	319	238	461	11.1025	6.96878	9.618	2.50249	2.15813	3.92961	-1.35801	down
TraesCS1A03G0951000	656	709	451	185	113	198	6.48763	7.15928	5.07181	1.92549	1.34523	2.23323	-1.41711	down
TraesCS7A03G0380000	2758	3486	2045	704	338	1059	9.16639	11.8469	7.74411	2.45849	1.36272	4.01645	-1.51681	down
TraesCS2D03G0399700	1024	871	321	246	86	218	4.77665	4.15226	1.70572	1.20782	0.486342	1.15586	-1.54376	down
TraesCS7A03G0637800	47	51	37	136	80	63	0.920077	1.01475	0.821534	2.79821	1.90433	1.39704	1.47495	up
TraesCS3B03G0411700	273	409	106	69	53	35	1.49859	2.29468	0.659923	0.397784	0.347504	0.2133	-1.83705	down
TraesCS3A03G0336500	169	161	84	49	33	21	1.04602	1.01614	0.593336	0.319713	0.24855	0.143072	-1.55377	down
TraesCS2B03G0508700	842	543	326	242	59	132	5.21728	3.4357	2.29952	1.5761	0.441292	0.932357	-1.55835	down
TraesCS4B03G0757400	970	1383	401	124	73	151	21.1908	30.8754	9.98361	2.83898	1.92094	3.74832	-2.48742	down
TraesCS5D03G0260300	45	36	28	122	94	92	0.679556	0.555771	0.479688	1.93659	1.71395	1.59304	1.94331	up
TraesCS7A03G0930800	96	137	140	280	191	209	1.30658	1.92093	2.18311	4.04357	3.18306	3.26122	1.28279	up
TraesCS1B03G0952700	422	374	252	93	26	125	2.21248	2.00563	1.5021	0.509267	0.160979	0.746495	-1.65458	down
TraesCS7A03G1121400	990	697	810	203	150	383	3.08652	2.2206	2.87622	0.666182	0.567628	1.36163	-1.32009	down
TraesCS7D03G0365300	617	1002	442	161	164	307	2.02512	3.36232	1.6531	0.554172	0.651504	1.14905	-1.20796	down
TraesCS4D03G0419500	734	1036	815	1317	1816	1119	8.57628	12.3756	10.8567	16.2078	25.7817	14.9278	1.17655	up
TraesCS1D03G0926600	324	337	263	108	84	95	3.38623	3.59818	3.13217	1.18201	1.05758	1.13336	-1.24152	down
TraesCS3D03G0802600	372	651	198	135	130	125	3.55298	6.36469	2.15711	1.35014	1.50871	1.35563	-1.14552	down
TraesCS1A03G1024200	320	528	305	148	147	122	0.85612	1.44382	0.928801	0.4167	0.476806	0.370177	-1.00275	down
TraesCS3D03G0593300	565	585	420	88	78	200	3.85061	4.07373	3.25432	0.625188	0.640197	1.54908	-1.62805	down

## Sheet: WCH vs. PCH
Gene ID	WCH2_Count	WCH3_Count	WCH1_Count	PCH1_Count	PCH2_Count	PCH3_Count	WCH2_FPKM	WCH3_FPKM	WCH1_FPKM	PCH1_FPKM	PCH2_FPKM	PCH3_FPKM	log2FC	regulated
TraesCS5B03G1094700	182	94	228	55	64	34	2.82344	1.37418	2.97101	0.657718	0.773164	0.453843	-2.13803	down
TraesCS5B03G1256600	690	122	1425	114	88	35	7.26166	1.21126	12.5701	0.919432	0.721275	0.31612	-3.53283	down
TraesCS1D03G0797500	5	14	11	122	203	81	0.032208	0.080872	0.059332	0.607085	1.02935	0.456916	3.35897	up
TraesCS4D03G0297800	1652	1091	2144	772	862	819	8.95997	5.61466	9.79286	3.22812	3.65662	3.88151	-1.38102	down

## Sheet: WHH vs. PHH
Gene ID	WHH1_Count	WHH2_Count	WHH3_Count	PHH3_Count	PHH2_Count	PHH1_Count	WHH1_FPKM	WHH2_FPKM	WHH3_FPKM	PHH3_FPKM	PHH2_FPKM	PHH1_FPKM	log2FC	regulated
TraesCS1D03G0455800	134	156	202	80	76	92	6.41573	7.05595	8.82452	3.32593	3.37746	3.54785	-1.16036	down
TraesCS7D03G1098600	2262	1600	2089	6070	7154	5867	28.417	18.9777	23.9808	66.738	83.7107	59.5233	1.34553	up
