# Supplementary material for: Exploring the Role of TaPLC1-2B in Heat Tolerance at Seedling and Adult Stages of Wheat through Transcriptome Analysis
Source: Int J Mol Sci. 2023 Nov 21;24(23):16583. doi: 10.3390/ijms242316583 (PMC10706844; doi:10.3390/ijms242316583)
Supplement: Supplementary file 1 [file ijms-24-16583-s001.zip › Table S4. PH vs. PHH and WH vs. WHH auxin related differentially expressed genes analysis..xlsx]

## Sheet: PH vs. PHH
Gene ID	PH1_Count	PH2_Count	PH3_Count	PHH1_Count	PHH2_Count	PHH3_Count	PH1_FPKM	PH2_FPKM	PH3_FPKM	PHH1_FPKM	PHH2_FPKM	PHH3_FPKM	log2FC	regulated
TraesCS5B03G1256600	5	0	0	180	106	100	0.03095	0	0	1.63633	1.02	0.840059	5.41551	up
TraesCS5A03G0917300	49	23	17	77	55	102	0.480118	0.285726	0.161224	0.900438	0.689256	1.10509	1.41293	up
TraesCS5D03G0440800	12	29	32	164	105	117	0.098255	0.302334	0.258168	1.61863	1.1004	1.06469	2.36788	up
TraesCS3D03G0491300	784	547	688	1084	1338	1378	5.80121	5.05695	4.95794	10.5551	12.4172	11.0862	1.05988	up
TraesCS3D03G0593300	9	13	8	200	78	88	0.058057	0.102394	0.045679	1.52907	0.631982	0.617268	3.38324	up
TraesCS7D03G1008100	96	45	105	404	247	358	0.617469	0.360153	0.658632	3.06103	1.98879	2.5048	2.16326	up
TraesCS3B03G0731600	26	25	10	199	74	67	0.252774	0.308595	0.113142	2.57541	0.964451	0.721573	2.32513	up
TraesCS2D03G0399700	15	7	13	218	86	246	0.066619	0.034301	0.053901	1.14093	0.480101	1.19251	3.83225	up
TraesCS3D03G0258900	470	386	538	30	63	32	11.5483	11.8699	12.871	0.840887	1.91678	0.846681	-3.18556	down
TraesCS7A03G0930800	24	55	52	209	191	280	0.304704	0.893767	0.657822	3.2191	3.14222	3.99234	2.36155	up
TraesCS6D03G0217200	27	15	23	218	230	356	0.610548	0.434492	0.507286	5.99193	6.73067	9.03251	3.64878	up
TraesCS3D03G0802600	296	302	365	125	130	135	2.69981	3.45038	3.2493	1.33812	1.48935	1.33304	-1.13558	down
TraesCS7B03G0778400	78	114	135	299	244	302	1.05095	1.93408	1.78021	4.78366	4.14084	4.45057	1.46349	up
TraesCS7D03G0801000	553	535	751	81	111	151	5.65225	6.85328	7.48649	0.966562	1.41368	1.67937	-2.23293	down
TraesCS1D03G0402200	66	71	80	330	232	308	0.292714	0.396272	0.349019	1.74354	1.30431	1.50182	2.09363	up
TraesCS5B03G1094700	38	31	57	89	91	112	0.423663	0.439959	0.632463	1.19323	1.29469	1.39001	1.32904	up
TraesCS3B03G0833700	104	82	66	144	184	197	0.520006	0.515676	0.324457	0.854454	1.15821	1.08035	1.15139	up
TraesCS2D03G0873500	56	63	104	111	173	206	1.47045	2.08566	2.68501	3.47712	5.7618	5.96131	1.23919	up
TraesCS3D03G0227900	625	445	534	15	6	0	4.52478	4.03264	3.76806	0.127549	0.045996	0	-4.1302	down
TraesCS1D03G0926600	336	147	250	95	84	108	3.35546	1.83563	2.4288	1.11872	1.04401	1.16703	-1.13627	down
TraesCS1A03G0201000	92	42	95	143	167	247	1.27595	0.730486	1.28648	2.34836	2.87237	3.61538	1.41118	up
TraesCS3D03G0670800	70	64	54	222	198	183	0.379887	0.434847	0.289346	1.4346	1.36107	1.09127	1.76688	up
TraesCS7D03G1033600	248	199	346	660	346	766	1.05591	1.05824	1.43671	3.31669	1.84902	3.55352	1.28237	up
TraesCS1B03G0589800	68	24	34	133	148	154	2.71564	1.16177	1.33268	6.30029	7.42912	6.74677	1.87376	up
TraesCS6D03G0220900	242	137	201	17	35	23	0.720219	0.511069	0.581728	0.058501	0.129449	0.071443	-2.643	down
TraesCS2D03G0861200	47	59	84	188	188	167	0.24347	0.380792	0.427076	1.15222	1.22316	0.941688	1.62203	up
TraesCS5D03G0876900	13	11	31	135	85	139	0.112598	0.120564	0.268856	1.45008	0.966916	1.37535	2.71078	up
TraesCS7D03G0896900	75	76	121	208	170	206	2.46976	3.11923	3.8876	8.05032	7.0251	7.37971	1.23396	up
TraesCS7D03G1068400	322	354	527	136	118	73	1.53976	2.11865	2.45909	0.76205	0.705366	0.376091	-1.63799	down

## Sheet: WH vs. WHH
Gene ID	WH1_Count	WH2_Count	WH3_Count	WHH1_Count	WHH2_Count	WHH3_Count	WH1_FPKM	WH2_FPKM	WH3_FPKM	WHH1_FPKM	WHH2_FPKM	WHH3_FPKM	log2FC	regulated
TraesCS2D03G0399700	2	4	9	534	221	197	0.010063	0.015281	0.044166	3.20521	1.25077	1.07978	5.68432	up
TraesCS5B03G1256600	98	124	124	690	122	281	0.854114	0.892801	1.13169	7.18587	1.19794	2.67067	1.95417	up
TraesCS3D03G0593300	9	21	8	403	160	148	0.065137	0.121786	0.055089	3.52974	1.32015	1.1789	4.32449	up
TraesCS7D03G1008100	45	71	58	235	383	99	0.321154	0.422586	0.438406	2.03102	3.13213	0.779956	2.29159	up
TraesCS3B03G0731600	10	4	13	242	169	119	0.111112	0.031729	0.152816	3.44277	2.22589	1.5545	4.26574	up
TraesCS7A03G1152200	138	178	115	11	5	13	1.80279	1.91289	1.57325	0.162823	0.062808	0.183653	-3.19726	down
TraesCS6D03G0720300	4	33	5	119	80	57	0.072167	0.486808	0.084954	2.5494	1.61794	1.11033	2.77925	up
TraesCS7A03G0930800	57	21	27	504	76	70	0.842679	0.249275	0.411682	8.89401	1.26469	1.11794	2.606	up
TraesCS6D03G0217200	31	22	12	115	164	142	0.796429	0.472513	0.318558	3.5978	4.85365	4.06752	2.92964	up
TraesCS7D03G0801000	350	642	264	40	78	54	4.03706	6.11262	3.20851	0.537926	1.0047	0.674165	-2.31968	down
TraesCS1D03G0455800	49	112	64	134	156	202	1.96534	3.69866	2.70228	6.41573	7.05595	8.82452	1.53151	up
TraesCS1D03G0402200	59	52	67	266	115	152	0.295419	0.213321	0.353943	1.60869	0.652314	0.836058	1.89545	up
TraesCS5B03G1094700	48	100	55	182	94	129	0.618728	1.06467	0.741585	2.79397	1.35907	1.81278	1.41908	up
TraesCS7A03G1152300	146	204	125	12	5	16	1.51035	1.74231	1.35684	0.139878	0.054555	0.17383	-3.13868	down
TraesCS3D03G0670800	65	96	75	103	276	180	0.400851	0.488733	0.489864	0.758625	1.92283	1.21201	1.56569	up
TraesCS7D03G0365300	54	182	103	257	392	333	0.189917	0.526666	0.38297	1.08447	1.56319	1.28374	1.91231	up
TraesCS7D03G1033600	177	215	184	1406	201	409	0.84734	0.851583	0.929675	8.08053	1.08815	2.14806	2.07793	up
TraesCS1B03G0589800	21	38	44	253	190	161	0.939056	1.40579	2.07348	13.7285	9.69831	7.94766	2.83511	up
TraesCS7D03G0896900	87	29	43	319	137	75	3.22223	0.873229	1.66565	14.1425	5.7295	3.04096	1.90932	up
