# Supplementary material for: Exploring the Role of TaPLC1-2B in Heat Tolerance at Seedling and Adult Stages of Wheat through Transcriptome Analysis
Source: Int J Mol Sci. 2023 Nov 21;24(23):16583. doi: 10.3390/ijms242316583 (PMC10706844; doi:10.3390/ijms242316583)
Supplement: Supplementary file 1 [file ijms-24-16583-s001.zip › Table S5. Differential expression of HSP related genes between different groups..xlsx]

## Sheet: PC vs. PH
Gene ID	PC1_Count	PC2_Count	PC3_Count	PH3_Count	PH1_Count	PH2_Count	PC1_FPKM	PC2_FPKM	PC3_FPKM	PH3_FPKM	PH1_FPKM	PH2_FPKM	log2FC	regulated
TraesCS7B03G0222300	2	0	3	4831	3709	2856	0.042495	0	0.095335	181.756	143.19	137.09	12.1672	up
TraesCS2D03G0717200	2	3	6	53584	52263	40976	0.020825	0.03997	0.071604	670.755	671.267	654.344	14.7317	up
TraesCS5D03G0614200	30202	23079	19497	153801	140771	137742	145.707	133.769	89.8991	731.478	686.957	835.723	3.60924	up
TraesCS4B03G0618200	15	0	28	145804	132434	134156	0.177762	0	0.315294	1710.97	1594.58	2008.32	14.3522	up
TraesCS3B03G0310700	10	9	28	64355	64889	53683	0.258429	0.261777	0.696602	1699.55	1758.32	1808.58	12.9706	up
TraesCS4A03G0202400	659	358	1248	176692	169445	164670	3.00538	1.96026	5.44336	796.579	784.062	946.619	8.90144	up
TraesCS6A03G0200500	310	279	253	455	438	475	4.2021	4.553	3.27728	6.09102	6.01128	8.10925	1.74778	up
TraesCS4B03G1016300	101	122	91	36652	39498	32004	0.533995	0.773835	0.472242	190	210.103	211.321	9.44531	up
TraesCS4D03G0167800	3	14	16	62250	59690	49576	0.027414	0.226818	0.200174	841.141	827.573	854.568	13.3662	up
TraesCS1B03G0962800	98	89	120	266890	278487	248362	0.380007	0.416267	0.446946	1028.82	1101.5	1221.35	12.381	up
TraesCS3B03G0975500	0	0	0	5361	5349	4660	0	0	0	36.7041	37.5715	40.6977	15.799	up
TraesCS2B03G0859500	7	0	11	36547	34896	23172	0.084404	0	0.134956	478.127	468.424	386.719	13.3801	up
TraesCS4A03G0190600	5	5	4	8713	10635	4266	0.131292	0.134708	0.09005	232.994	291.787	145.511	11.7001	up
TraesCS4B03G0204300	3	7	10	49919	55183	40186	0.049714	0.122729	0.152307	837.818	950.305	860.416	13.8525	up
TraesCS1B03G0380400	790	587	1176	5970	5709	4366	3.09578	2.76097	4.40664	23.0759	22.6408	21.5248	3.69222	up
TraesCS4D03G0585100	11	4	5	52924	57691	34392	0.064317	0.023416	0.026637	305.048	341.191	252.884	13.8363	up
TraesCS4D03G0298400	13	5	17	46850	41255	36436	0.184319	0.080941	0.229662	692.462	625.662	687.013	12.8372	up
TraesCS7B03G0223000	262	172	688	19702	21394	17242	3.36423	2.64811	8.45596	250.051	278.607	279.173	6.77455	up
TraesCS7A03G0671700	1118	1032	1567	53869	54856	41223	9.4727	10.506	12.6855	449.986	470.174	439.285	6.36409	up
TraesCS4D03G0521000	34	61	133	140284	139134	127861	0.907875	1.99423	3.46699	3775.12	3841.77	4389.47	11.8526	up
TraesCS6A03G0869800	777	559	1008	8549	7465	8042	4.49779	3.89114	5.57831	48.868	43.8069	58.6391	4.42559	up
TraesCS3D03G0239200	7	2	13	65201	58151	44391	0.121639	0.041989	0.234105	1235.78	1130.88	1073.33	13.922	up
TraesCS7B03G0222100	20	10	58	11470	11683	9809	0.413202	0.232971	1.18196	241.83	252.74	263.811	9.62259	up
TraesCS5D03G0266500	447	261	807	2902	3553	2168	1.75019	1.22472	3.02028	11.2104	14.0871	10.6833	3.55896	up
TraesCS7B03G0355800	113	77	133	39937	38983	32029	1.33163	1.08546	1.49673	464.794	465.519	475.529	9.46595	up
TraesCS5B03G0672800	25999	19553	19194	142983	133365	126145	121.84	110.09	85.9703	649.95	626.112	741.597	3.67674	up
TraesCS6B03G0872700	1205	942	2219	8716	9076	6648	4.68413	4.39997	8.25015	33.4257	35.7136	32.5252	3.53065	up
TraesCS5D03G0609900	56	54	92	85220	83521	79921	0.600274	0.702066	0.958226	915.784	920.915	1095.63	11.3176	up
TraesCS5B03G0646100	3941	2800	4262	105997	109642	90396	17.1631	14.6607	17.7372	455.297	483.165	495.325	5.84411	up
TraesCS3D03G0239500	0	0	0	483	441	326	0	0	0	13.7642	12.8903	11.8442	12.1578	up
TraesCS2B03G0962800	7788	6287	5903	8945	8532	7871	38.6817	37.5128	28.0196	43.7955	42.8636	49.1669	1.37948	up
TraesCS3D03G0078900	3	0	2	1058	1598	501	0.078521	0	0.041046	28.8215	44.6664	17.4097	10.2894	up
TraesCS7D03G0537900	1250	1081	1958	322220	313124	299192	6.48784	6.74378	9.72044	1649.99	1645.2	1954.47	8.82512	up
TraesCS3D03G0079700	0	0	1	723	827	1227	0	0	0.007594	20.2044	23.7098	43.7686	12.4336	up
TraesCS3D03G0081100	12	5	15	47723	51417	32567	0.193546	0.093131	0.229943	766.663	847.545	667.429	13.0274	up
TraesCS4A03G0203800	43	33	40	184416	191867	145806	0.230407	0.206896	0.207101	988.602	1056.05	997.147	13.1651	up
TraesCS7A03G0415200	43	3	368	38000	40069	31770	0.528017	0.042617	4.31651	460.315	498.027	490.949	9.1643	up
TraesCS3A03G0071700	903	915	1516	1745	1603	1056	23.4513	28.541	37.6236	44.6774	42.117	34.4935	1.41409	up
TraesCS2D03G0061400	53	33	106	372301	360903	336442	0.260397	0.197921	0.497936	1809.57	1799.69	2085.37	13.5144	up
TraesCS7B03G0222800	18	8	16	169	173	106	0.122053	0.05879	0.103736	1.16131	1.22215	0.92521	4.4359	up
TraesCS6D03G0619500	724	497	1402	4869	5120	3674	2.93073	2.41574	5.42376	19.4306	20.9659	18.7052	3.43255	up
TraesCS4B03G0584900	323	238	452	196273	193678	186125	4.17141	3.69393	5.58559	2506.1	2537.42	3031.74	10.2144	up
TraesCS6A03G0823100	5	4	42	45456	40021	40265	0.064322	0.055086	0.561434	630.237	569.339	712.177	12.3674	up
TraesCS5B03G0667300	40	33	64	42463	37309	38373	0.494956	0.489604	0.770212	527.911	475.924	608.601	10.808	up
TraesCS7D03G0403500	0	0	0	189	414	173	0	0	0	2.75994	6.20602	3.22436	11.4655	up
TraesCS4A03G0190300	3	2	1	20416	22009	14457	0.025107	0.018487	0.009829	237.603	262.815	214.632	14.2271	up
TraesCS3A03G0245800	3	3	19	51683	47482	41764	0.040672	0.054773	0.269856	782.958	738.062	807.123	13.5317	up
TraesCS3D03G0081000	8	3	15	67296	73661	52260	0.199197	0.071365	0.394688	1882.46	2114.22	1864.89	13.8922	up
TraesCS6B03G1039600	1115	1137	1212	8314	7600	7051	6.18578	7.57716	6.42708	45.4761	42.6501	49.2013	3.7592	up
TraesCS6D03G0696500	4	3	72	32948	28643	26318	0.041419	0.041044	0.83014	423.488	376.904	435.464	11.2233	up
TraesCS4A03G0191000	148	169	142	138789	140743	120350	3.99229	5.47782	3.67944	3711.42	3861.75	4105.65	10.789	up
TraesCS7B03G0405300	1256	1074	2495	392495	378736	366507	5.98099	6.1444	11.3597	1843.35	1825.09	2195.87	8.94801	up
TraesCS4D03G0520700	251	156	341	183325	181166	170242	3.36686	2.50618	4.36962	2428.28	2462.22	2876.7	10.5488	up
TraesCS5D03G0595900	2111	1197	2410	94443	102503	74636	9.82644	6.69704	10.7162	433.347	482.578	436.902	6.61942	up
TraesCS4A03G0135000	11	6	21	82880	83218	69021	0.134749	0.07515	0.242725	1002.07	1032.38	1064.59	13.6383	up
TraesCS3A03G0694700	0	0	0	165	794	166	0	0	0	1.63473	8.08517	2.09171	11.9759	up
TraesCS3A03G0070300	2	0	2	8248	8311	3783	0.049752	0	0.04068	230.695	238.542	134.978	13.2994	up
TraesCS5A03G0661300	2125	870	4193	25392	27906	21860	11.3991	5.60085	21.4946	134.283	151.421	147.478	4.46856	up
TraesCS3A03G0070200	6	0	65	85439	91498	63760	0.087115	0	0.982209	1347.13	1480.27	1282.47	12.8289	up
TraesCS7B03G0930300	10	3	14	28761	23741	19560	0.152247	0.045959	0.208575	466.153	394.817	404.417	12.4108	up
TraesCS5B03G0637400	6	0	6	38483	38757	26056	0.091748	0	0.090701	664.24	686.4	573.733	14.0919	up
TraesCS5B03G0699800	2721	1340	3254	23000	23521	19955	13.3855	7.91883	15.2973	111.548	117.047	123.466	4.25214	up
TraesCS7A03G0415600	47	44	376	40037	42571	34718	0.567838	0.62923	4.36099	479.98	523.655	530.955	9.06384	up
TraesCS7B03G0222700	0	5	50	35394	36649	25658	0	0.080416	0.638779	468.331	497.578	433.099	11.8688	up
TraesCS3A03G0245900	5	7	6	40727	32652	27401	0.080459	0.12938	0.091191	672.054	552.843	576.818	13.469	up
TraesCS3A03G0246200	17	6	11	65546	59925	56615	0.245561	0.093914	0.152816	956.612	897.368	1054.08	13.4352	up
TraesCS1A03G0339400	5493	4034	6966	223003	220326	187787	27.417	24.1914	33.2354	1097.44	1112.52	1178.92	6.30746	up
TraesCS3B03G0975400	61	24	77	233985	231366	199238	0.320229	0.15332	0.388437	1230.27	1248.2	1336.39	13.0685	up
TraesCS6B03G0268600	442	344	367	941	815	907	5.94555	5.55612	4.71585	12.4843	11.0963	15.3555	2.25989	up
TraesCS7A03G0474600	0	0	0	6153	5697	4740	0	0	0	188.191	178.784	184.956	15.8998	up
TraesCS1D03G0287300	603	525	851	209805	210907	176233	2.47086	2.58628	3.33532	848.509	875.197	909.243	9.27917	up
TraesCS7D03G0403300	3	5	5	3217	3609	2204	0.038132	0.061185	0.05167	40.3034	46.3925	35.2304	10.4504	up
TraesCS3D03G0238800	2	1	0	14045	13103	9571	0.034575	0.018227	0	366.365	350.685	318.477	14.5967	up
TraesCS5A03G0647900	28363	22010	19830	94696	89802	76222	138.801	129.407	92.7504	456.848	444.616	469.175	2.92064	up
TraesCS3A03G0070700	4	5	22	86957	83268	78099	0.066498	0.100286	0.353337	1494.87	1468.75	1712.75	14.0249	up
TraesCS6B03G1056600	0	0	12	29350	24380	23316	0	0	0.1427	387.552	330.312	392.758	13.7563	up
TraesCS3D03G0780900	32	21	45	246398	242711	214416	0.176389	0.137578	0.239466	1360.59	1375.16	1510.43	13.8586	up
TraesCS2B03G1068900	8	4	0	8687	8357	8183	0.073929	0.039245	0	85.6293	84.5185	102.892	12.0848	up
TraesCS1D03G0318900	7976	6007	10884	258024	242904	223701	37.1599	33.623	48.4655	1185.19	1144.82	1310.83	5.91986	up
TraesCS1D03G0681300	494	381	1042	385140	368766	355992	2.5245	2.33487	5.08729	1941.02	1906.93	2288.77	10.2494	up
TraesCS6D03G0752200	0	0	3	16156	15704	12176	0	0	0.038222	230.765	230.159	221.866	14.8685	up
TraesCS5A03G0627200	2274	1631	2446	39835	37169	34111	10.1168	8.719	10.3999	174.732	167.286	190.876	5.17856	up
TraesCS1A03G0737400	99	86	92	27008	26024	23799	0.506203	0.529298	0.446886	142.579	141.285	159.591	9.1543	up
TraesCS4D03G0519400	267	204	213	101854	99422	93670	4.58139	4.18689	3.49014	1723.09	1725.78	2021.54	9.79668	up
TraesCS1A03G0839300	20	10	53	188302	193996	161367	0.079438	0.047895	0.204469	760.098	803.493	830.962	13.7471	up
TraesCS3D03G0239400	8	5	5	41241	32218	29805	0.141503	0.101918	0.068419	727.602	583.213	670.809	13.515	up
TraesCS4B03G0583900	242	256	219	14507	14116	13782	3.92466	4.97631	3.39525	232.164	231.8	281.384	6.91986	up
TraesCS7D03G0644300	1235	1042	1556	82005	82994	64223	9.91401	10.0487	11.9413	649.297	674.261	648.701	6.93599	up
TraesCS6B03G0561300	2	0	10	9898	10918	5855	0.023697	0	0.116615	120.006	135.829	90.5577	12.1743	up
TraesCS7A03G0415400	0	0	0	1890	1974	1325	0	0	0	35.9181	38.4945	32.1136	14.2106	up
TraesCS7D03G0403400	10	4	12	2361	2387	1539	0.125629	0.062266	0.13785	30.1954	31.3231	25.1027	8.93525	up
TraesCS6B03G0977900	8	6	95	30361	26014	26467	0.096743	0.090508	1.20971	429.29	372.504	472.48	10.6784	up
TraesCS6A03G0736900	567	381	1801	11332	11731	7572	2.22208	1.79367	6.75434	43.8553	46.5789	37.3802	4.5334	up
TraesCS4B03G0573700	510	291	757	86321	80302	76672	2.54304	1.74364	3.60712	424.634	405.319	481.159	8.35892	up
TraesCS4D03G0519100	311	253	342	9282	9233	8216	5.16729	5.05065	5.4382	152.375	155.524	172.053	5.92686	up
TraesCS4D03G0546300	11	4	17	137502	140874	124153	0.129113	0.056958	0.191328	1625.51	1708.78	1872.36	14.671	up
TraesCS4B03G0571100	146	104	136	282638	299131	251188	0.794924	0.678533	0.707181	1524.41	1655.42	1728.31	12.119	up
TraesCS5B03G0271100	295	277	1017	8835	8204	7310	1.31594	1.48464	4.34289	38.9259	37.0861	41.0845	5.00629	up
TraesCS3D03G0079600	12	6	32	106997	101164	98280	0.158087	0.090874	0.409102	1436.64	1393.73	1683.43	13.6524	up
TraesCS5A03G0257000	1544	1091	1629	1809	1770	1437	6.47883	5.49969	6.53623	7.48676	7.51305	7.58232	1.27468	up
TraesCS2A03G1179300	240	147	206	54	39	39	1.55022	1.13566	1.2706	0.342703	0.254172	0.315971	-1.12886	down
TraesCS4D03G0507200	735	387	1349	231264	233911	205736	3.78546	2.39221	6.64816	1175.74	1220.19	1334.33	9.16299	up
TraesCS6D03G0379900	10	3	21	42155	42846	36074	0.131683	0.048953	0.282083	594.808	620.315	649.336	12.8511	up
TraesCS4D03G0283400	3465	3077	2386	5937	5158	5597	18.7726	20.0282	12.3524	31.7106	28.2661	38.1354	1.94106	up
TraesCS7D03G0404400	0	0	0	516	538	330	0	0	0	6.5114	6.97457	5.31144	12.2966	up
TraesCS3D03G0239100	12	2	6	67828	60014	47670	0.184156	0.036463	0.094786	1116.37	1013.5	1000.91	14.1272	up
TraesCSU03G0235000	0	3	3	4676	4799	2680	0	0.046336	0.038581	88.8719	93.5902	64.9843	11.9811	up
TraesCS7D03G0517200	30	9	214	42049	39836	36104	0.403999	0.139375	2.7542	560.456	544.803	613.898	9.97563	up
TraesCS1A03G0295200	4637	3750	5563	32761	32643	26757	17.8928	17.3853	20.5157	124.63	127.416	129.853	3.76337	up
TraesCS4D03G0519600	15	6	23	163334	172503	122301	0.216527	0.110662	0.326546	2477.32	2684.58	2366.4	14.3796	up
TraesCS3D03G0780300	36	40	37	282072	273792	243235	0.18358	0.242635	0.180822	1423.27	1417.49	1565.68	13.8199	up
TraesCS3D03G0080400	13	4	21	77996	81920	67948	0.20686	0.06496	0.339319	1300.51	1401.53	1445.33	13.6016	up
TraesCS2A03G0066600	64	29	112	363097	362171	329660	0.29123	0.155439	0.48928	1637.17	1675.55	1896.21	13.4075	up
TraesCS2B03G0098600	38	23	56	357845	355052	319626	0.16573	0.118829	0.236493	1563.2	1591.43	1781.2	14.1639	up
TraesCS1D03G0287900	3878	3117	5077	17328	17443	14143	16.7557	16.2522	20.9592	72.7947	76.308	76.8069	3.06052	up
TraesCS7D03G0404200	2	0	9	4153	5085	2780	0.023899	0	0.130383	62.9746	79.1316	53.7875	11.1114	up
TraesCS5D03G0632400	2258	1107	4112	22257	23273	19899	11.8182	6.95714	20.5692	114.843	123.218	130.983	4.2096	up
TraesCS3D03G0081200	9	3	11	27809	30878	19982	0.240153	0.076933	0.274275	777.894	886.234	713.033	12.7634	up
TraesCS1B03G0429800	825	565	887	35616	32687	29470	2.52992	2.08187	2.60069	107.756	101.473	113.743	6.47282	up
TraesCS4A03G0135200	0	0	0	2862	2621	2188	0	0	0	35.8854	33.7199	34.9942	14.7865	up
TraesCS3D03G0238700	2	0	3	17715	16659	12706	0.032028	0	0.041019	279.652	269.835	255.872	14.2251	up
TraesCS3D03G0238500	2	0	1	53670	43662	37867	0.031949	0	0.015268	845.177	705.485	760.72	16.4862	up
TraesCS1D03G0808500	158	168	190	280129	288014	256593	0.620682	0.792125	0.713432	1088.73	1148.56	1272.21	11.6785	up
TraesCS6D03G0740700	583	410	761	13681	12717	12364	3.02369	2.55558	3.77511	70.0237	66.7861	80.7333	5.52684	up
TraesCS7B03G0566600	743	601	978	30146	31039	21926	6.4316	6.24989	8.09426	257.554	272.096	238.968	6.19119	up
TraesCS4A03G0189400	56	55	74	1533	1588	1306	1.58601	1.8523	1.98555	42.8637	45.5683	46.5946	5.61524	up
TraesCS1B03G0380000	62	54	52	17490	16482	14129	0.258837	0.265349	0.206089	73.1921	68.4167	72.9144	9.19146	up
TraesCS4D03G0504900	122	99	137	365738	360080	341084	0.673736	0.652375	0.723588	1992.84	2013.14	2370.91	12.591	up
TraesCS5A03G1127700	67657	54881	51711	97706	91329	85482	332.486	324.022	242.876	473.338	453.979	528.293	1.69188	up
TraesCS3B03G0310800	4	0	5	44788	39138	33067	0.055396	0	0.0765	777.277	696.923	732.08	14.6974	up
TraesCS4D03G0519200	22	14	53	108768	111173	92964	0.317122	0.249065	0.744381	1598.39	1676.31	1742.8	12.84	up
TraesCS2A03G0776900	8	1	8	35563	40030	25318	0.095847	0.014908	0.092342	450.023	519.748	408.706	13.5586	up
TraesCS3D03G0079900	1	5	5	35062	38640	34087	0.009209	0.160989	0.118908	974.37	1101.8	1208.45	14.3006	up
TraesCS3D03G0239000	5	5	10	39120	34314	26453	0.062584	0.077446	0.14246	603.38	543.04	520.503	13.3059	up
TraesCS2D03G1324600	0	3	0	7650	8814	6343	0	0.018389	0	40.9291	48.3859	43.2949	13.917	up
TraesCS3A03G0694500	626	579	1096	218831	220618	194151	2.48506	2.76038	4.15871	856.5	885.999	969.415	9.15679	up
TraesCS6A03G0452700	4	2	7	15050	15697	12270	0.050992	0.020728	0.082445	189.124	202.402	196.713	12.7261	up
TraesCS7D03G0404300	0	0	0	2569	2561	1402	0	0	0	28.8398	29.4983	20.0699	14.5225	up
TraesCS7A03G0555500	663	514	1507	353776	339697	330346	3.3514	3.1233	7.29011	1765.51	1739.43	2103.11	9.65055	up

## Sheet: WC vs. WH
Gene ID	WC1_Count	WC3_Count	WC2_Count	WH1_Count	WH2_Count	WH3_Count	WC1_FPKM	WC3_FPKM	WC2_FPKM	WH1_FPKM	WH2_FPKM	WH3_FPKM	log2FC	regulated
TraesCS7B03G0222300	3	8	4	4285	5204	3223	0.098926	0.290754	0.192092	186.763	187.099	148.005	10.5986	up
TraesCS2D03G0717200	0	60	101	49893	62907	52049	0	0.772187	1.61486	723.58	752.489	795.283	10.8222	up
TraesCS5D03G0614200	18993	19694	17312	131559	179452	148871	103.552	96.5869	105.608	730.94	815.605	864.285	3.90628	up
TraesCS4B03G0618200	15	204	234	130475	158939	123843	0.200357	2.46602	3.50764	1773.88	1782.27	1773.91	10.6874	up
TraesCS3B03G0310700	0	85	111	68171	76156	61025	0	2.29179	3.75357	2085.82	1921.9	1967.2	10.88	up
TraesCS4A03G0202400	1070	3386	2058	159223	188399	168293	5.5199	15.7137	11.8766	830.408	811.258	925.016	7.21931	up
TraesCS6A03G0200500	280	266	221	251	333	263	4.29294	3.6691	3.79456	3.89454	4.25935	4.29954	1.01221	up
TraesCS4B03G1016300	15	94	60	21542	27247	22364	0.086362	0.517269	0.415329	129.287	134.82	141.228	9.62066	up
TraesCS5D03G1081100	35002	41139	37627	43439	58841	47794	208.23	220.15	250.462	261.165	291.791	302.746	1.26534	up
TraesCS4D03G0167800	3	54	98	59074	74142	52930	0.030981	0.747517	1.68458	924.795	957.334	873.003	11.0389	up
TraesCS1B03G0962800	49	357	400	221258	238681	210975	0.212741	1.41644	1.97534	988.16	879.215	992.712	10.5688	up
TraesCS3B03G0975500	0	0	4	5000	5515	4585	0	0	0.028045	39.6554	36.0825	38.3138	12.7565	up
TraesCS2B03G0859500	2	45	63	41514	52016	37734	0.029996	0.600621	1.04188	629.23	650.28	602.575	11.0529	up
TraesCS4A03G0190600	4	3	23	8894	12721	7663	0.109955	0.055152	0.780806	275.55	325.07	250.111	10.6697	up
TraesCS4B03G0204300	2	103	98	61627	81226	62989	0.038225	1.7663	2.09859	1198.35	1302.73	1290.44	10.8543	up
TraesCS1B03G0380400	526	1032	671	4338	8100	6096	2.32782	4.11014	3.32384	19.4237	29.9189	28.7592	3.93221	up
TraesCS4D03G0585100	3	52	60	30945	52396	32042	0.019779	0.305237	0.436753	206.647	288.595	225.435	10.7979	up
TraesCS4D03G0298400	0	53	63	48099	43904	35071	0	0.8065	1.18949	823.657	620.102	632.741	10.9605	up
TraesCS7B03G0223000	1097	477	470	19978	25432	24343	15.9574	6.24012	7.6417	293.764	308.445	377.131	5.96158	up
TraesCS7A03G0671700	1458	1430	1010	50186	54744	39733	13.9581	12.3134	10.8121	485.695	436.986	405.136	6.09419	up
TraesCS4D03G0521000	47	152	213	136548	143034	126318	1.43359	4.21772	7.34239	4257.29	3678.18	4149.3	10.796	up
TraesCS6A03G0869800	445	1010	580	6575	13693	12762	2.9078	5.94692	4.24469	43.5399	74.7936	89.0427	4.9198	up
TraesCS3D03G0239200	1	111	125	55774	84032	56499	0.010864	2.16858	3.03016	1224.74	1521.96	1307.1	10.5332	up
TraesCS7B03G0222100	49	34	48	15036	14821	13144	1.17227	0.72661	1.28468	367.268	298.587	338.249	9.22485	up
TraesCS5D03G0266500	228	938	392	1755	9272	4618	1.00971	3.73681	1.94067	7.85492	34.2361	21.7808	4.18227	up
TraesCS4B03G0333800	1773	2045	1662	1807	2387	1854	13.3023	13.8028	13.9643	13.7092	14.9385	14.8175	1.01326	up
TraesCS7B03G0355800	188	388	255	51568	57271	62554	2.50319	4.65343	3.79621	695.334	636.933	888.652	8.60387	up
TraesCS5B03G0672800	21752	19258	15993	126367	172825	142422	115.202	91.7454	94.7695	670.323	759.212	797.322	3.82364	up
TraesCS6B03G0872700	1385	1277	941	5492	11088	6835	6.08904	5.04784	4.62633	24.4018	40.6334	31.9944	3.54455	up
TraesCS5D03G0609900	34	144	173	68180	90633	73862	0.407527	1.59515	2.37241	848.853	930.698	968.855	10.2237	up
TraesCS5B03G0646100	2905	4185	2246	85964	116124	87463	14.2965	18.5441	12.3759	428.045	476.936	459.162	5.84968	up
TraesCS3D03G0239500	0	0	0	440	788	594	0	0	0	14.5286	21.4759	20.6885	12.5431	up
TraesCS7D03G0458500	0	0	0	1555	2648	746	0	0	0	55.0813	77.3812	27.8493	13.9322	up
TraesCS2B03G0962800	3247	3761	3118	6511	10163	8357	18.2247	18.9907	19.5789	36.9369	47.5497	49.9458	2.17363	up
TraesCS3D03G0078900	0	2	10	2065	3386	2520	0	0.028106	0.332593	65.1908	88.1642	83.8099	10.1397	up
TraesCS7D03G0537900	1490	3044	1949	289042	353058	298681	8.74485	16.0739	12.7955	1714.8	1727.62	1866.91	8.08052	up
TraesCS3D03G0079700	0	0	1	1989	1276	718	0	0	0.005502	64.4445	34.0952	24.4854	12.7377	up
TraesCS3D03G0081100	4	111	133	58568	71834	66020	0.062188	1.83347	2.72481	1090.09	1102.76	1294.62	10.4894	up
TraesCS4A03G0203800	11	264	312	187918	242255	187109	0.064397	1.45727	2.14032	1167.76	1241.38	1224.44	10.8871	up
TraesCS7A03G0415200	336	378	223	56461	66071	53988	4.66488	4.7147	3.45624	792.405	764.815	798.275	8.45208	up
TraesCS2D03G0061400	16	503	529	309385	364653	316075	0.08765	2.51503	3.29554	1741.8	1693.12	1874.44	10.7532	up
TraesCS7B03G0222800	39	168	126	69163	85244	74793	0.306841	1.19244	1.1114	552.195	561.349	629.136	10.3218	up
TraesCS6D03G0619500	640	998	641	2946	7087	4558	2.92677	4.10398	3.28097	13.6183	27.0279	22.2024	3.53414	up
TraesCS4A03G0740100	68	119	45	189	681	514	0.547162	0.867944	0.405158	1.54696	4.61045	4.44605	3.46249	up
TraesCS4B03G0584900	408	486	490	195675	210071	188999	5.9688	6.39217	8.01889	2894.64	2563.15	2945.66	9.62172	up
TraesCS6A03G0823100	7	80	99	43804	51764	44773	0.107448	1.13466	1.75016	703.635	685.82	757.72	10.4145	up
TraesCS5B03G0667300	100	172	159	74648	88627	72990	1.42174	2.19751	2.53111	1075.21	1052.92	1107.65	9.97238	up
TraesCS7D03G0403500	0	12	6	2283	2315	3293	0	0.176894	0.106823	38.7282	32.3898	58.8576	9.73809	up
TraesCS4A03G0190300	1	4	2	3896	2357	2208	0.009117	0.047073	0.015625	52.5267	26.2106	31.3554	11.1584	up
TraesCS3A03G0245800	0	64	66	49145	47560	43013	0	0.993146	1.27356	862.569	688.497	795.375	10.9505	up
TraesCS3D03G0081000	0	138	115	78380	80009	75368	0	3.96411	4.12533	2540.18	2138.68	2573.41	10.7528	up
TraesCS6B03G1039600	570	864	574	4799	9565	7974	3.56831	4.86984	4.02043	30.4087	49.9931	53.2376	4.3534	up
TraesCS6D03G0696500	4	52	53	23986	32378	26907	0.042939	0.698078	0.813286	360.726	395.293	425.69	10.4431	up
TraesCS4A03G0191000	267	326	302	144836	146398	117359	8.17221	8.9624	10.3379	4487.27	3741.02	3830.78	9.71034	up
TraesCS7B03G0405300	1154	2394	1677	341532	418995	358790	6.20967	11.593	10.0992	1858.35	1880.41	2056.84	8.63714	up
TraesCS4D03G0520700	422	588	643	179723	188024	169136	6.39544	8.0305	10.9214	2758.05	2379.91	2734.62	9.21353	up
TraesCS5D03G0595900	2016	3876	1840	76336	104075	74174	10.601	18.342	10.8292	405.83	456.328	415.46	5.94406	up
TraesCS4A03G0135000	0	146	204	85239	113025	86920	0	1.81559	3.15079	1194.02	1305.86	1282.78	10.5025	up
TraesCS3A03G0070300	0	5	9	6763	8967	7900	0	0.141922	0.309292	219.158	239.671	269.738	11.5915	up
TraesCS5A03G0661300	3369	4369	4195	24577	40052	30768	20.4248	23.8215	28.454	150.583	202.404	198.612	3.85254	up
TraesCS3A03G0070200	0	125	137	76488	96591	83413	0	2.02504	2.76401	1397.24	1455.33	1605.37	10.7984	up
TraesCS7B03G0930300	2	79	69	74975	82099	57968	0.026261	1.3156	1.41724	1407.88	1271.56	1146.84	11.3634	up
TraesCS5B03G0637400	0	36	66	33447	44493	36234	0	0.623098	1.45978	668.85	733.875	763.414	10.9414	up
TraesCS5B03G0699800	3291	4292	4041	22640	30960	23541	18.2944	21.4632	25.1392	127.216	143.486	139.365	3.59053	up
TraesCS7A03G0415600	9	388	234	60779	69188	59621	0.112606	4.79243	3.58592	844.188	792.616	872.453	9.15274	up
TraesCS7B03G0222700	11	118	78	37104	57534	51092	0.166862	1.59865	1.31232	568.808	727.471	825.208	10.3623	up
TraesCS3A03G0245900	0	57	33	33698	43079	31872	0	0.95769	0.687766	644.241	679.284	641.959	11.1502	up
TraesCS3A03G0246200	3	106	92	57441	63197	58193	0.035024	1.58959	1.71454	971.255	881.374	1036.68	10.6904	up
TraesCS1A03G0339400	6355	8889	5567	196394	284141	222509	35.8477	45.1055	35.1357	1119.74	1336.21	1336.6	5.96404	up
TraesCS3B03G0975400	11	417	445	207524	244591	206816	0.06451	2.25841	2.99548	1264.16	1228.92	1327.34	10.4265	up
TraesCS6B03G0268600	292	232	178	465	574	355	4.4399	3.16936	3.02454	7.1456	7.27382	5.74196	1.85025	up
TraesCS7A03G0474600	2	20	20	6707	11145	8930	0.048861	0.605431	0.752032	237.679	325.772	333.395	10.1806	up
TraesCS1D03G0287300	372	1107	713	168884	230159	178558	1.72293	4.61653	3.69537	791.321	889.489	881.47	8.93525	up
TraesCS7D03G0403300	0	24	5	4586	8557	5759	0	0.298652	0.080254	66.5656	102.449	88.0769	10.3097	up
TraesCS3D03G0238800	0	31	21	15150	17350	13619	0	0.816305	0.68034	457.854	432.473	433.632	10.6982	up
TraesCS5A03G0647900	19288	18560	15934	68862	109564	85606	106.673	92.3308	98.5991	384.895	505.102	504.563	3.15594	up
TraesCS3A03G0070700	3	159	96	80226	87962	81739	0.039416	2.81157	2.10555	1597.86	1444.98	1715.19	10.8472	up
TraesCS6B03G1056600	0	43	38	26681	26717	19864	0	0.577622	0.641705	408.167	337.12	320.155	10.7045	up
TraesCS3D03G0780900	8	331	381	220433	243270	202925	0.047035	1.88404	2.69243	1410.23	1283.66	1367.77	10.7158	up
TraesCS2B03G1068900	29	41	42	10824	8738	8286	0.3174	0.41413	0.528558	123.612	82.3022	99.6957	8.84938	up
TraesCS1D03G0318900	8392	13291	7982	194477	281939	226993	44.1861	62.9522	47.0283	1034.95	1237.53	1272.7	5.45927	up
TraesCS1D03G0681300	440	1404	1203	319500	377743	337727	2.54081	7.29231	7.77157	1865.54	1819.19	2077.6	9.29392	up
TraesCS6D03G0752200	0	14	29	17481	14890	11853	0	0.20504	0.527798	289.288	203.233	206.649	10.8271	up
TraesCS5A03G0627200	2330	3724	1986	30119	47743	36079	11.7136	16.8406	11.1696	153.062	200.12	193.173	4.71652	up
TraesCS1A03G0737400	54	47	75	13857	18940	16094	0.311194	0.240482	0.491393	91.7692	96.8291	105.918	8.96152	up
TraesCS4D03G0519400	365	451	504	105207	113358	101669	7.05959	7.86644	10.92	2062.04	1832.55	2099.45	8.79013	up
TraesCS1A03G0839300	4	276	245	152453	163712	138787	0.017832	1.14551	1.26547	712.974	631.493	683.834	10.6465	up
TraesCS3D03G0239400	4	54	85	32839	37795	27672	0.065396	0.973828	1.90938	671.232	637.187	595.919	10.2511	up
TraesCS3A03G0071900	1913	1650	1046	119	226	154	27.2052	21.0999	16.6414	1.70778	2.6708	2.33167	-2.34596	down
TraesCS4B03G0583900	358	207	225	13529	15874	13204	6.55981	3.40997	4.61547	250.851	242.761	257.942	6.61354	up
TraesCS7D03G0644300	1442	1392	1077	80404	90851	68775	13.0827	11.3615	10.9333	737.578	687.399	664.69	6.81588	up
TraesCS6B03G0561300	10	42	58	20307	32797	22316	0.125474	0.518148	0.901962	285.266	380.002	330.28	10.2484	up
TraesCS7A03G0415400	0	0	0	2514	3870	2934	0	0	0	55.3579	70.2862	68.061	14.9027	up
TraesCS7D03G0403400	3	15	10	3632	6384	4447	0.034419	0.187346	0.15459	53.8327	78.0497	69.4409	9.8788	up
TraesCS6B03G0977900	11	68	59	26390	32292	27662	0.158734	0.92172	0.995289	426.311	436.238	477.389	10.1733	up
TraesCS6A03G0736900	736	1104	457	6789	14557	9126	3.26158	4.40521	2.26845	30.4395	53.8321	43.1069	4.61006	up
TraesCS4B03G0573700	1427	3591	2692	216259	252737	219129	8.04451	18.2163	16.9853	1232.53	1188.07	1315.79	7.37311	up
TraesCS4D03G0519100	542	319	240	8361	9981	8329	10.1937	5.39999	5.04774	159.008	156.577	166.892	5.47438	up
TraesCS4D03G0546300	3	181	221	131210	160583	136320	0.037495	2.20172	3.34319	1797.09	1814.06	1967.1	10.8992	up
TraesCS4B03G0571100	33	552	431	245452	300947	251836	0.198397	3.06573	2.97601	1533.77	1551.08	1657.97	10.5108	up
TraesCS5B03G0271100	299	1148	474	5371	24062	13247	1.50739	5.21403	2.6743	27.4163	101.307	71.2408	5.34007	up
TraesCS3D03G0079600	4	169	138	95445	105291	99686	0.053054	2.32882	2.35986	1484.75	1350.96	1633.8	10.8163	up
TraesCS5A03G0257000	1305	1768	990	1175	3436	1737	6.1871	7.54264	5.25431	5.62997	13.5884	8.77323	1.48165	up
TraesCS2A03G1179300	168	232	142	50	28	27	1.22489	1.52096	1.15377	0.363893	0.169024	0.209176	-1.44581	down
TraesCS4D03G0507200	1963	4730	3123	216137	263070	225970	11.4377	24.7939	20.3627	1273.08	1278.04	1402.3	7.06686	up
TraesCS5B03G1195500	66330	91424	88773	96433	110245	98793	406.347	503.795	608.487	597.034	562.963	644.409	1.18354	up
TraesCS6D03G0379900	0	78	77	35034	49666	40659	0	1.1268	1.39291	572.716	669.671	700.288	10.5257	up
TraesCS4D03G0283400	2066	2335	1704	4122	7701	6518	12.6471	12.8603	11.6709	25.5074	39.3068	42.4953	2.45895	up
TraesCS7D03G0404400	0	3	3	1917	4405	3143	0	0.035633	0.033512	28.0766	53.2115	48.4849	11.4739	up
TraesCS3D03G0239100	1	57	69	55864	82109	58102	0.009434	0.962121	1.44931	1065.26	1291.41	1167.28	11.4294	up
TraesCSU03G0235000	2	7	22	8024	11745	8263	0.039227	0.122782	0.524848	176.707	213.351	191.735	10.5999	up
TraesCS7D03G0517200	60	257	178	69789	71122	68735	0.916303	3.53195	3.04163	1077.7	905.868	1118.28	9.63925	up
TraesCS1A03G0295200	2742	5049	3158	23553	41810	30334	11.9569	19.8044	15.41	103.808	151.989	140.856	4.00526	up
TraesCS4D03G0519600	5	236	185	117887	145517	109885	0.070363	3.67628	3.5814	2071.55	2109.08	2034.38	10.6624	up
TraesCS3D03G0780300	13	387	377	250948	278765	231453	0.069568	2.01303	2.43563	1467.01	1344.11	1425.52	10.8121	up
TraesCS3D03G0080400	0	165	141	88273	98072	86918	0	2.82826	2.9997	1705.26	1562.63	1769.04	10.6951	up
TraesCS2A03G0066600	33	565	656	309282	386555	335274	0.16851	2.62626	3.79319	1615.66	1665.53	1845.25	10.542	up
TraesCS2B03G0098600	10	395	433	269730	348675	270954	0.046273	1.77767	2.421	1365.13	1455.5	1444.78	10.9075	up
TraesCS1D03G0287900	2448	4751	3589	13185	23723	16409	12.0565	20.9092	19.6047	65.1263	95.2724	85.1633	3.16708	up
TraesCS7D03G0404200	0	11	16	5744	11623	7511	0	0.166729	0.3022	100.934	168.457	139.046	10.6558	up
TraesCS5D03G0632400	2925	3931	4063	23206	36469	30060	17.2998	20.9121	26.8888	138.729	179.825	189.332	3.89351	up
TraesCS3D03G0081200	2	75	53	30010	44421	32391	0.051951	2.14739	1.86808	972.583	1187.4	1105.99	10.5701	up
TraesCS1B03G0429800	1033	1334	748	32074	43734	36271	3.58201	4.16196	2.90124	112.429	126.442	133.95	6.06511	up
TraesCS4A03G0135200	0	12	0	3035	3157	2876	0	0.143739	0	44.0943	37.8302	44.0235	10.621	up
TraesCS3D03G0238700	0	15	29	17913	21787	17331	0	0.237354	0.584671	327.618	328.66	333.96	11.1529	up
TraesCS3D03G0238500	0	49	68	48101	49613	35189	0	0.780565	1.3601	877.585	746.583	676.411	10.988	up
TraesCS1D03G0808500	56	404	373	246376	257602	224774	0.245323	1.61775	1.85636	1109.39	956.721	1066.34	10.6576	up
TraesCS6D03G0740700	411	973	521	13875	24396	19731	2.40965	5.13158	3.41909	82.28	119.328	123.274	5.82627	up
TraesCS7B03G0566600	760	759	533	26222	27593	20171	7.4417	6.68003	5.83599	259.55	225.268	210.349	6.05476	up
TraesCS4A03G0189400	67	90	53	1130	1906	1633	2.14152	2.57383	1.89809	36.6033	50.9473	55.7416	5.36069	up
TraesCS1B03G0380000	24	95	72	14965	20879	16553	0.111709	0.408448	0.38042	70.1415	85.6189	83.9564	8.98275	up
TraesCS4D03G0504900	18	458	535	317603	385014	327727	0.107649	2.56831	3.73759	2004.98	2004.7	2179.72	10.8508	up
TraesCS5A03G1127700	33086	41227	37038	75294	112596	90390	183.748	205.956	230.153	422.603	521.249	534.511	2.18467	up
TraesCS3B03G0310800	4	47	81	38946	47675	36512	0.074011	0.836214	1.7834	783.055	790.635	773.445	10.6845	up
TraesCS4D03G0519200	33	155	179	115145	120848	102124	0.542921	2.33393	3.36368	1960.43	1697.05	1831.87	10.7118	up
TraesCS2A03G0776900	0	76	105	41651	55851	41729	0	0.990535	1.6933	610.635	675.369	644.555	10.4185	up
TraesCS3D03G0079900	1	57	55	38624	38021	34454	0.010195	1.6287	1.94533	1243.56	1009.67	1168.71	10.8278	up
TraesCS3D03G0239000	6	48	70	37399	42736	30788	0.094776	0.759748	1.36937	668.306	629.88	579.647	10.6378	up
TraesCS2D03G1324600	0	17	10	3336	3968	4576	0	0.092474	0.067533	20.6738	20.2849	29.8832	9.71906	up
TraesCS3A03G0694500	1139	1279	811	233568	210758	183742	5.10965	5.16028	4.07024	1059.14	788.27	877.837	8.5082	up
TraesCS6A03G0452700	4	19	30	16656	26395	18694	0.056091	0.243291	0.477361	242.511	316.973	286.76	11.0161	up
TraesCS7D03G0404300	0	2	22	4072	9082	6239	0	0.019298	0.310813	52.9685	97.4441	85.507	10.3569	up
TraesCS7A03G0555500	639	1530	1068	318304	379516	326278	3.65499	7.86945	6.83328	1840.38	1809.85	1987.54	9.2023	up

## Sheet: WC vs. PC
Gene ID	WC1_Count	WC3_Count	WC2_Count	PC1_Count	PC2_Count	PC3_Count	WC1_FPKM	WC3_FPKM	WC2_FPKM	PC1_FPKM	PC2_FPKM	PC3_FPKM	log2FC	regulated
TraesCS4A03G0202400	1070	3386	2058	659	358	1248	5.5199	15.7137	11.8766	3.00538	1.96026	5.44336	-1.66258	down
TraesCS7B03G0355800	188	388	255	113	77	133	2.50319	4.65343	3.79621	1.33163	1.08546	1.49673	-1.48975	down
TraesCS3A03G0071700	3468	2639	2510	903	915	1516	101.82	69.6877	82.4563	23.4513	28.541	37.6236	-1.51282	down
TraesCS5B03G0667300	100	172	159	40	33	64	1.42174	2.19751	2.53111	0.494956	0.489604	0.770212	-1.79919	down
TraesCS4A03G0191000	267	326	302	148	169	142	8.17221	8.9624	10.3379	3.99229	5.47782	3.67944	-1.08278	down
TraesCS4D03G0520700	422	588	643	251	156	341	6.39544	8.0305	10.9214	3.36686	2.50618	4.36962	-1.31127	down
TraesCS4D03G0519400	365	451	504	267	204	213	7.05959	7.86644	10.92	4.58139	4.18689	3.49014	-1.09604	down
TraesCS3A03G0071900	1913	1650	1046	287	310	1077	27.2052	21.0999	16.6414	3.60589	4.68034	12.9534	-1.60436	down
TraesCS4B03G0573700	1427	3591	2692	510	291	757	8.04451	18.2163	16.9853	2.54304	1.74364	3.60712	-2.45428	down
TraesCS4D03G0507200	1963	4730	3123	735	387	1349	11.4377	24.7939	20.3627	3.78546	2.39221	6.64816	-2.13637	down
TraesCS2A03G0066600	33	565	656	64	29	112	0.16851	2.62626	3.79319	0.29123	0.155439	0.48928	-2.80264	down

## Sheet: WH vs. PH
Gene ID	WH1_Count	WH2_Count	WH3_Count	PH3_Count	PH1_Count	PH2_Count	WH1_FPKM	WH2_FPKM	WH3_FPKM	PH3_FPKM	PH1_FPKM	PH2_FPKM	log2FC	regulated
TraesCS3D03G0078900	2065	3386	2520	1058	1598	501	65.1908	88.1642	83.8099	28.8215	44.6664	17.4097	-1.36129	down
TraesCS7B03G0222800	69163	85244	74793	169	173	106	552.195	561.349	629.136	1.16131	1.22215	0.92521	-9.01046	down
TraesCS4A03G0740100	189	681	514	25	25	29	1.54696	4.61045	4.44605	0.17438	0.1814	0.257377	-4.05985	down
TraesCS7D03G0403500	2283	2315	3293	189	414	173	38.7282	32.3898	58.8576	2.75994	6.20602	3.22436	-3.38933	down
TraesCS4A03G0190300	3896	2357	2208	20416	22009	14457	52.5267	26.2106	31.3554	237.603	262.815	214.632	2.7101	up
TraesCS7B03G0930300	74975	82099	57968	28761	23741	19560	1407.88	1271.56	1146.84	466.153	394.817	404.417	-1.5751	down
TraesCS7D03G0403300	4586	8557	5759	3217	3609	2204	66.5656	102.449	88.0769	40.3034	46.3925	35.2304	-1.04639	down
TraesCS6B03G0561300	20307	32797	22316	9898	10918	5855	285.266	380.002	330.28	120.006	135.829	90.5577	-1.49805	down
TraesCS7D03G0403400	3632	6384	4447	2361	2387	1539	53.8327	78.0497	69.4409	30.1954	31.3231	25.1027	-1.18808	down
TraesCS4B03G0573700	216259	252737	219129	86321	80302	76672	1232.53	1188.07	1315.79	424.634	405.319	481.159	-1.48381	down
TraesCS7D03G0404400	1917	4405	3143	516	538	330	28.0766	53.2115	48.4849	6.5114	6.97457	5.31144	-2.75381	down
TraesCSU03G0235000	8024	11745	8263	4676	4799	2680	176.707	213.351	191.735	88.8719	93.5902	64.9843	-1.2103	down
TraesCS7D03G0404200	5744	11623	7511	4153	5085	2780	100.934	168.457	139.046	62.9746	79.1316	53.7875	-1.02917	down
TraesCS7D03G0404300	4072	9082	6239	2569	2561	1402	52.9685	97.4441	85.507	28.8398	29.4983	20.0699	-1.56046	down

## Sheet: PCH vs. PHH
Gene ID	PCH1_Count	PCH2_Count	PCH3_Count	PHH3_Count	PHH2_Count	PHH1_Count	PCH1_FPKM	PCH2_FPKM	PCH3_FPKM	PHH3_FPKM	PHH2_FPKM	PHH1_FPKM	log2FC	regulated
TraesCS7D03G0517200	19281	9346	17799	60241	56562	51363	275.16	136.333	289.442	904.969	980.182	836.399	2.26547	up
TraesCS6B03G1039600	1713	1683	2012	4132	4528	3132	10.0323	10.0745	13.4257	25.4687	32.1966	20.9295	1.55003	up
TraesCS4D03G0519100	3584	1822	3423	6361	6668	6562	62.9975	32.7208	68.5455	117.685	142.303	131.612	1.56479	up
TraesCS7D03G0403400	688	437	471	3525	3349	3681	9.41965	6.10935	7.34818	50.8237	55.7036	57.5276	3.16887	up
TraesCS3D03G0081000	23860	11435	24640	40457	39053	46071	714.633	350.108	840.942	1275.49	1420.3	1574.48	1.47359	up
TraesCS7D03G0644300	22007	14083	27429	37499	39900	43664	186.567	122.042	264.973	334.635	410.745	422.383	1.33747	up
TraesCS7D03G0404400	200	55	61	1533	1077	1012	2.706	0.750517	0.931779	21.8357	17.6945	15.6166	3.96107	up
TraesCS3D03G0239000	10259	4135	6311	23599	19014	22495	169.411	69.7998	118.752	410.231	381.291	423.88	2.07976	up
TraesCS3D03G0239400	14778	8258	12889	32628	29085	29222	279.153	159.452	277.443	648.783	667.133	629.851	1.75682	up
TraesCS7A03G0415200	21296	10999	17165	60386	53772	62686	276.208	145.833	253.687	824.446	846.877	927.724	2.26042	up
TraesCS4D03G0519400	48927	30050	49862	110830	99089	105182	886.256	556.416	1029.17	2113.21	2179.44	2173.95	1.70112	up
TraesCS7B03G0285700	1990	558	1593	3449	3933	3560	65.1609	18.6783	59.4502	118.902	156.413	133.023	1.81385	up
TraesCS2D03G0481700	1057	1080	582	104	108	79	18.9412	19.7853	11.8703	1.95185	2.34428	1.61417	-2.75094	down
TraesCS1D03G0318900	85096	65721	110097	175219	166513	171206	418.52	330.414	617.01	907.116	994.411	960.777	1.38089	up
TraesCS3D03G0081100	14548	4822	5797	19011	16033	24593	250.245	84.777	113.611	344.213	334.879	482.677	1.69897	up
TraesCS1B03G0962800	81751	63670	129055	177417	149832	159261	337.427	268.639	606.977	770.821	750.932	750.056	1.21157	up
TraesCS4D03G0167800	18095	9983	21231	34518	33067	45212	261.788	147.639	350.013	525.677	580.91	746.37	1.59864	up
TraesCS7B03G0405300	119114	88502	158854	261116	246239	275519	598.982	455.907	910.254	1382.17	1503.56	1580.89	1.49797	up
TraesCS2A03G0066600	115805	77376	130471	272747	247928	276010	559.085	381.856	717.754	1386.07	1453.4	1520.45	1.70841	up
TraesCS4D03G0546300	40251	21592	37785	89200	89004	94649	509.492	279.372	544.992	1188.5	1367.98	1367.02	1.87044	up
TraesCS2D03G0061400	96394	70341	121756	191591	182520	209182	501.771	374.506	722	1050.23	1153.16	1241.62	1.42278	up
TraesCS3D03G0079900	12528	6438	12088	22312	23826	26728	372.772	195.807	409.837	698.843	860.832	907.469	1.6481	up
TraesCS6A03G0869800	4772	3491	5968	11989	11813	12678	28.0072	20.9344	39.8797	73.8804	83.9917	88.9269	1.76655	up
TraesCS6D03G0752200	7341	4768	7985	16009	12203	12062	112.275	74.5361	139.15	257.722	226.626	210.486	1.40191	up
TraesCS2B03G0962800	5232	4026	5275	7340	7035	7577	27.426	21.5753	31.5134	40.5077	44.7845	45.3242	1.02017	up
TraesCS7B03G0222100	6733	3718	6772	19991	16499	16718	151.977	85.7823	174.195	475.026	452.262	430.612	2.03003	up
TraesCS7B03G0566600	9788	5943	10205	13141	13705	15795	89.5359	55.573	106.376	126.532	152.227	164.86	1.13514	up
TraesCS5A03G1127700	43721	38740	51058	75110	79594	101735	226.79	205.415	301.79	410.109	501.328	602.141	1.37046	up
TraesCS7A03G0555500	119051	88173	155613	260705	236216	268217	636.142	481.619	947.501	1466.38	1532.65	1635.33	1.47895	up
TraesCS3D03G0780900	69834	40451	79244	133202	119003	137415	395.431	234.14	511.31	793.941	818.224	887.842	1.44205	up
TraesCS7D03G0404200	2489	933	767	16108	11933	10371	40.4075	15.4753	14.1783	275.356	235.296	192.173	3.64844	up
TraesCS4B03G0584900	88621	58668	108566	198189	168135	195727	1211.58	819.903	1691.31	2852.13	2791.17	3053.27	1.53512	up
TraesCS7D03G0403300	1775	736	861	8420	6158	7136	23.8099	10.0899	13.1589	118.906	100.318	109.228	3.12358	up
TraesCS3B03G0310600	19622	11179	16653	55541	45439	43384	347.133	202.169	335.71	1034.3	976.11	875.768	2.01926	up
TraesCS4D03G0521000	59930	45375	72762	132191	115991	127382	1726.81	1336.49	2389.02	4009.41	4058.25	4188.04	1.4834	up
TraesCS6D03G0619500	2655	1686	2377	7116	6164	6889	11.3419	7.36026	11.5671	32.0027	31.9768	33.5857	2.00708	up
TraesCS5D03G0614200	49226	36056	62679	83467	86092	104448	250.679	187.689	363.712	447.417	532.349	606.906	1.30049	up
TraesCS4A03G0135000	17981	6796	15047	26912	33423	33727	232.768	89.9248	221.966	366.733	525.382	498.189	1.66251	up
TraesCS5B03G0672800	47317	35566	60820	78954	76767	97944	229.74	174.595	332.722	411.114	457.811	550.744	1.22997	up
TraesCS1A03G0718600	134702	101885	179784	292602	267496	300395	772.477	595.67	1172.01	1764.6	1857.71	1963.19	1.44945	up
TraesCS3D03G0238800	5343	2061	3042	13937	11293	12345	149.208	58.8433	96.7841	409.722	382.985	393.412	2.27587	up
TraesCS6D03G0740700	5372	3660	6614	12994	13000	13227	29.4384	20.5012	41.3007	74.9599	86.5124	82.7121	1.73216	up
TraesCS2B03G0098600	86314	63618	106714	189566	189006	198896	403.719	304.179	568.762	933.328	1073.46	1061.51	1.57971	up
TraesCS2D03G0717200	30012	12973	17315	41121	35850	42943	402.247	177.744	264.449	580.153	583.456	656.734	1.42909	up
TraesCS3D03G0080400	21906	10691	8540	48266	47175	55917	391.098	195.1	173.725	907.052	1022.69	1139.1	2.34813	up
TraesCS7A03G0671700	18627	11257	20833	31079	31038	34340	166.605	102.923	212.327	292.602	337.084	350.463	1.33719	up
TraesCS5A03G0627200	24433	20811	30114	41634	41426	45420	114.751	99.9145	161.161	205.828	236.249	243.404	1.18699	up
TraesCS4A03G0189100	72799	38827	74109	148326	137475	151538	1350.91	736.512	1567.06	2897.3	3097.69	3208.66	1.64352	up
TraesCS1B03G0429800	10029	6280	12581	21843	20909	24031	32.4873	20.7944	46.44	74.4836	82.2475	88.8258	1.61041	up
TraesCS4D03G0519200	56077	29432	55038	102474	92259	100974	882.365	473.402	986.811	1697.26	1762.71	1812.88	1.48156	up
TraesCS2B03G1068900	4884	3329	4688	12606	10113	10670	51.5401	35.9116	56.3768	140.047	129.607	128.495	1.78581	up
TraesCS4B03G0571100	76525	46331	83256	116452	127872	140521	441.931	273.509	547.867	707.898	896.682	925.956	1.31703	up
TraesCS4D03G0504900	78142	47148	86947	140222	153133	176019	455.897	281.182	578.027	861.132	1084.83	1171.76	1.56001	up
TraesCS4A03G0190600	1259	258	385	1570	1368	1125	36.0227	7.5472	12.5399	47.2939	47.5596	36.7324	1.54095	up
TraesCS7A03G0415400	877	480	646	4044	4101	3637	17.8416	9.97703	14.9627	86.6308	101.336	84.4509	2.98877	up
TraesCS7D03G0403500	383	117	219	938	1592	1678	5.99257	1.87008	3.91132	15.4805	30.2971	30.0084	3.00448	up
TraesCS7A03G0415600	23509	12160	18387	70544	63255	68834	301.761	159.556	268.937	953.171	985.932	1008.19	2.3297	up
TraesCS4D03G0298400	22674	11322	19716	49466	39398	42640	358.837	183.153	355.544	824.035	757.108	769.989	1.70045	up
TraesCS4D03G0520700	74701	53501	88607	147617	126755	144244	1059.45	775.649	1431.97	2203.77	2182.88	2334.28	1.35483	up
TraesCS3D03G0239100	11937	5409	10116	37948	35764	38024	210.354	97.4337	203.128	703.942	765.296	764.601	2.43989	up
TraesCS3A03G0070200	24704	10571	17706	39123	35489	47329	417.048	182.425	340.599	695.242	727.497	911.708	1.6299	up
TraesCS3B03G0312200	25645	15847	24821	54851	45050	46349	441.127	278.649	486.494	993.148	940.94	909.696	1.55092	up
TraesCS4D03G0507200	101308	84152	132256	178416	165144	205336	551.475	468.267	820.365	1022.33	1091.58	1275.4	1.1995	up
TraesCS3D03G0079600	15215	9166	17500	23195	23385	29204	218.741	134.705	286.685	351.009	408.222	479.059	1.26591	up
TraesCS3D03G0239200	11377	4258	7908	29371	29607	32926	230.882	88.3216	182.86	627.413	729.564	762.418	2.39149	up
TraesCS4D03G0519600	43758	21755	35499	63315	66544	72661	710.62	361.152	656.92	1082.34	1312.21	1346.43	1.43078	up
TraesCS7D03G0537900	110093	76535	141214	216149	206192	234397	603.627	428.961	882.263	1247.49	1372.75	1466.42	1.40607	up
TraesCS7B03G0222300	1563	881	1635	5386	5993	4776	62.9526	36.2683	75.0449	228.374	293.178	219.522	2.39772	up
TraesCS6D03G0696500	15252	8739	17779	46649	36946	37137	212.26	126.29	286.506	689.4	630.883	589.825	1.92237	up
TraesCS5D03G0609900	18704	7887	19573	42389	45195	53657	215.202	92.7614	256.621	513.396	631.443	704.457	2.01936	up
TraesCS7D03G0404300	1563	457	361	10383	8189	6859	18.7867	5.61404	4.93677	131.396	119.545	94.0828	3.87701	up
TraesCS7A03G0474600	3126	1056	1399	8177	6942	8158	102.353	35.3454	52.1843	281.884	276.068	304.855	2.5035	up
TraesCS5D03G0632400	5863	3571	8142	10379	10149	11642	32.3909	20.1646	51.2575	60.3582	68.0865	73.3889	1.26603	up
TraesCS3D03G0239500	218	87	126	948	833	810	6.63807	2.69631	4.35549	30.4619	30.8714	28.2121	3.01984	up
TraesCS1D03G0287300	59112	40142	81530	117719	123579	126055	255.975	177.69	402.299	536.585	649.797	622.843	1.42294	up
TraesCS1A03G0839300	77851	51720	105449	127916	117695	134708	336.478	228.505	519.337	581.959	617.679	664.332	1.0906	up
TraesCS4B03G0618200	31102	18024	37895	66679	79683	76026	390.788	231.493	542.554	881.891	1215.7	1089.96	1.7615	up
TraesCS3D03G0238500	22474	12903	20549	50379	44844	43445	378.931	222.384	394.805	894.16	918.148	835.855	1.72399	up
TraesCS4A03G0191000	35918	19548	35584	107366	94814	84987	1028.42	572.149	1160.98	3235.98	3296.46	2776.61	2.06153	up
TraesCS3D03G0081200	5063	1406	2875	9854	7989	11093	151.625	43.0238	98.1152	310.651	290.54	379.08	2.05617	up
TraesCS1A03G0339400	74606	47055	84079	168026	162254	175272	388.175	250.267	498.722	920.242	1025.08	1040.55	1.70588	up
TraesCS3A03G0245800	28191	16878	28486	58937	48238	51809	457.276	279.847	526.514	1006.31	950.095	958.899	1.51817	up
TraesCS3D03G0238700	8141	2684	5551	18050	15074	16939	137.6	46.3659	106.905	321.146	309.389	326.699	2.02737	up

## Sheet: WHH vs. PHH
Gene ID	WHH1_Count	WHH2_Count	WHH3_Count	PHH3_Count	PHH2_Count	PHH1_Count	WHH1_FPKM	WHH2_FPKM	WHH3_FPKM	PHH3_FPKM	PHH2_FPKM	PHH1_FPKM	log2FC	regulated
TraesCS2B03G1397900LC	0	0	0	73	57	100	0	0	0	3.24199	2.93625	4.80954	8.70871	up
TraesCS7D03G0404400	235	332	522	1533	1077	1012	3.43467	4.86419	8.36462	21.8357	17.6945	15.6166	1.64204	up
TraesCS3D03G0081100	42726	42216	55544	19011	16033	24593	796.367	786.686	1132.86	344.213	334.879	482.677	-1.27183	down
TraesCS6A03G0869800	5248	8054	3315	11989	11813	12678	33.2928	51.0342	22.9918	73.8804	83.9917	88.9269	1.17143	up
TraesCS3D03G0079700	2083	2639	1721	549	720	1143	67.6027	85.617	61.1002	17.2839	26.1794	39.0371	-1.3893	down
TraesCS7D03G0404200	1465	2046	3229	16108	11933	10371	25.7629	35.9793	62.1712	275.356	235.296	192.173	2.41929	up
TraesCSU03G0235000	1859	2438	2581	1150	570	1112	40.9851	53.7587	62.2704	24.6301	14.0751	25.806	-1.33221	down
TraesCS2B03G1068900	5498	4878	5914	12606	10113	10670	62.88	55.7685	74.0068	140.047	129.607	128.495	1.00949	up
TraesCS4A03G0190600	6906	8589	6874	1570	1368	1125	214.261	266.424	233.342	47.2939	47.5596	36.7324	-2.47165	down
TraesCS7A03G0415400	1205	1431	1346	4044	4101	3637	26.5606	31.5439	32.4785	86.6308	101.336	84.4509	1.55034	up
TraesCSU03G0374800LC	337	4265	6747	265	102	698	15.1028	191.194	331.055	11.5058	5.11645	32.9533	-3.55909	down
TraesCS2A03G0776900	22681	24402	24941	9952	8321	11591	332.99	358.184	400.689	141.94	136.895	179.196	-1.28863	down
TraesCS6D03G0696500	15851	18123	17964	46649	36946	37137	234.771	266.291	290.958	689.4	630.883	589.825	1.1902	up
TraesCS7D03G0404300	662	1526	2282	10383	8189	6859	8.61861	19.8757	32.5192	131.396	119.545	94.0828	2.39766	up
TraesCS3D03G0081200	20312	23386	22158	9854	7989	11093	659.195	758.805	786.892	310.651	290.54	379.08	-1.20399	down

## Sheet: PH vs. PHH
Gene ID	PH1_Count	PH2_Count	PH3_Count	PHH1_Count	PHH2_Count	PHH3_Count	PH1_FPKM	PH2_FPKM	PH3_FPKM	PHH1_FPKM	PHH2_FPKM	PHH3_FPKM	log2FC	regulated
TraesCS3B03G1055400	12	12	7	125	58	78	0.129425	0.157694	0.068332	1.67624	0.820819	0.966952	2.91884	up
TraesCS2D03G0481700	7	29	32	79	108	104	0.111574	0.607327	0.52039	1.59332	2.3142	1.92713	2.01411	up
TraesCS4B03G0999100	71	15	124	848	803	484	0.290677	0.074996	0.49713	4.13971	4.16911	2.17787	3.37659	up
TraesCS7D03G0404200	5147	2818	4191	10371	11933	16108	79.8757	54.7317	63.4163	189.691	232.276	271.868	1.8	up
TraesCS4D03G0504900	360075	341102	365745	176019	153133	140222	2007.73	2380.48	1988.22	1156.63	1070.91	850.223	-1.02173	down
TraesCS3D03G0239500	436	322	474	810	833	948	12.7064	11.7336	13.4843	27.8476	30.4753	30.076	1.22682	up
TraesCS7D03G0403500	413	173	186	1678	1592	938	6.17692	3.2373	2.71145	29.6207	29.9084	15.2844	2.53567	up
TraesCS7D03G0404400	512	320	510	1012	1077	1533	6.62339	5.18041	6.42177	15.4149	17.4674	21.5591	1.5749	up
TraesCS7D03G1292300	141	221	198	522	318	274	2.75531	5.39386	3.76319	12.0327	7.80248	5.8255	1.07733	up
TraesCS7A03G0415400	1976	1327	1886	3637	4101	4044	38.426	32.2904	35.7676	83.36	100.036	85.5333	1.34304	up
TraesCS4A03G0190600	10632	4260	8709	1125	1368	1570	290.938	145.891	232.339	36.2579	46.9494	46.6948	-2.29896	down
TraesCS7D03G0404300	2559	1401	2568	6859	8189	10383	29.4038	20.1371	28.7623	92.8675	118.011	129.732	2.1128	up
TraesCS4D03G0585100	57694	34392	52927	10174	8621	7967	340.3	253.892	304.352	70.7148	63.7761	51.0974	-2.22375	down
TraesCS3D03G0081200	30615	18261	27237	11093	7989	9854	876.349	654.242	760.091	374.184	286.812	306.716	-1.20583	down
TraesCS4A03G0135000	83226	69053	83137	33727	33423	26912	1029.71	1069.32	1002.82	491.754	518.641	362.087	-1.14481	down
TraesCS4D03G0519600	173032	122685	163882	72661	66544	63315	2685.61	2383.28	2479.82	1329.04	1295.37	1068.63	-1.00293	down
TraesCS7D03G0403300	3613	2202	3220	7136	6158	8420	46.321	35.3294	40.2437	107.818	99.0308	117.399	1.41739	up
TraesCS2A03G0179500	259	204	330	46	62	85	1.59864	1.57685	1.98543	0.332637	0.479452	0.565628	-1.83158	down
TraesCS2A03G0776900	40031	25317	35558	11591	8321	9952	518.373	410.326	448.907	176.881	135.138	140.142	-1.56692	down

## Sheet: WH vs. WHH
Gene ID	WH1_Count	WH2_Count	WH3_Count	WHH1_Count	WHH2_Count	WHH3_Count	WH1_FPKM	WH2_FPKM	WH3_FPKM	WHH1_FPKM	WHH2_FPKM	WHH3_FPKM	log2FC	regulated
TraesCS7B03G0222700	37104	57536	51092	10087	7559	16791	566.636	725.183	822.555	183.975	130.187	279.74	-1.56584	down
TraesCS4B03G0999100	61	92	82	261	1628	83	0.283067	0.354507	0.403519	1.45584	8.57863	0.421347	2.88863	up
TraesCS7D03G0404200	5889	11825	7680	1373	829	3229	103.077	170.833	141.725	28.6994	16.3654	61.6575	-1.62581	down
TraesCS3D03G0239200	57918	82717	56119	22284	15929	23778	1266.95	1493.37	1294.15	582.174	392.972	567.441	-1.16893	down
TraesCS7D03G0404400	1906	4378	3126	396	193	522	27.7967	52.7111	48.0801	6.8871	3.16105	8.29551	-2.44338	down
TraesCS4A03G0740100	189	681	515	29	109	79	1.60164	4.65878	4.55319	0.2833	1.01427	0.714426	-2.08802	down
TraesCS7D03G0404300	4070	9078	6235	563	585	2282	52.741	97.0956	85.1798	8.6996	8.53859	32.2505	-1.86913	down
TraesCS4A03G0135000	85239	113027	86914	25102	29150	45506	1189.47	1301.71	1278.57	418.358	458.767	692.75	-1.05447	down
TraesCS5D03G0266500	1753	9269	4619	1143	1758	936	7.81385	34.1151	21.7129	6.08793	8.84033	4.5493	-1.43847	down
TraesCS3B03G0311700	43485	55618	39978	17050	12774	19013	1333.71	1407.86	1292.59	624.536	441.841	636.144	-1.02814	down
TraesCS3D03G0239100	54489	83366	57774	22027	18053	28363	1035.06	1307	1156.95	499.731	386.765	587.765	-1.02779	down
