# Supplementary material for: Exploring the Role of TaPLC1-2B in Heat Tolerance at Seedling and Adult Stages of Wheat through Transcriptome Analysis
Source: Int J Mol Sci. 2023 Nov 21;24(23):16583. doi: 10.3390/ijms242316583 (PMC10706844; doi:10.3390/ijms242316583)
Supplement: Supplementary file 1 [file ijms-24-16583-s001.zip › Table S6. Differential expression of HSF related genes between different groups..xlsx]

## Sheet: PC vs. PH
Gene ID	PC1_Count	PC2_Count	PC3_Count	PH3_Count	PH1_Count	PH2_Count	PC1_FPKM	PC2_FPKM	PC3_FPKM	PH3_FPKM	PH1_FPKM	PH2_FPKM	log2FC	regulated
TraesCS5A03G0764500	1353	1065	1082	4759	4020	4123	10.8712	10.2788	8.30922	37.6998	32.6729	41.6686	2.92352	up
TraesCS5B03G0798100	672	633	585	3684	3150	3225	5.12283	4.57878	3.42425	21.3151	18.9109	24.1561	3.44614	up
TraesCS1B03G1070300	170	207	191	67195	60118	55534	1.30413	1.99619	1.39698	538.875	491.593	569.239	9.35217	up
TraesCS7B03G0732100	0	0	6	12223	10020	9983	0	0	0.06446	136.047	114.426	141.749	13.481	up
TraesCS5A03G0919800	58	117	179	52345	46791	41283	0.445592	1.09266	1.33074	401.979	368.692	404.435	9.65526	up
TraesCS6B03G0315100	122	64	155	209	191	124	0.857441	0.539064	1.04046	1.45057	1.35896	1.09632	1.65238	up
TraesCS2D03G0174000	292	206	386	359	390	204	3.04859	2.57619	3.84771	3.69242	4.11707	2.6761	1.12321	up
TraesCS7A03G0882300	2	0	2	29888	25794	24236	0.018607	0	0.017965	279.705	247.678	289.341	15.3254	up
TraesCS1D03G0889300	264	260	205	69840	61062	57189	2.17626	2.58002	1.61448	569.236	510.662	594.63	9.03388	up
TraesCS6A03G0226100	162	174	211	472	459	275	1.04179	1.34771	1.30408	3.00584	2.99836	2.23134	2.13907	up
TraesCS5D03G0723300	883	720	646	4466	3660	4049	6.65692	6.51961	4.6531	33.1937	27.9114	38.3925	3.47955	up
TraesCS2D03G0442700	252	307	642	373	482	364	1.58861	2.23782	3.7378	2.07384	2.8229	2.60563	1.07124	up
TraesCS5D03G0879400	29	64	159	63519	54744	50456	0.211041	0.577239	1.14043	471.058	416.563	477.35	10.4313	up
TraesCS7D03G0610900	27	25	41	14558	14047	12822	0.197009	0.213938	0.286401	107.357	106.074	120.739	9.84325	up
TraesCS2A03G0964500	13	5	0	7272	7356	7207	0.116127	0.053128	0	68.9122	71.5253	87.1203	11.3003	up
TraesCS5D03G0566700	1823	1108	2077	10557	11467	10668	13.4971	9.85255	14.6978	77.0796	85.9017	99.3625	3.77724	up
TraesCS5B03G1347800	2110	1726	1616	387	468	321	11.5585	11.3573	8.45754	2.08955	2.58907	2.20513	-1.19198	down
TraesCS2D03G0906200	5	16	8	8564	8144	7937	0.040271	0.154042	0.063415	71.0232	69.3017	83.9727	10.7589	up
TraesCS3D03G0664900	912	615	701	2146	2051	1689	8.19262	6.63067	6.01781	19.009	18.6341	19.0804	2.43651	up
TraesCS3B03G0806900	249	224	259	317	290	216	3.34535	3.61632	3.33508	4.20521	3.94907	3.65352	1.185	up

## Sheet: WC vs. WH
Gene ID	WC1_Count	WC3_Count	WC2_Count	WH1_Count	WH2_Count	WH3_Count	WC1_FPKM	WC3_FPKM	WC2_FPKM	WH1_FPKM	WH2_FPKM	WH3_FPKM	log2FC	regulated
TraesCS5A03G0764500	1393	1007	854	3949	5291	4248	12.6465	8.2206	8.6738	36.2422	40.0519	41.0803	2.91769	up
TraesCS2B03G0557700	499	928	527	139	183	121	3.76039	6.28921	4.44551	1.05301	1.14684	0.969	-1.25208	down
TraesCS5B03G0798100	896	817	525	3103	3737	2943	5.97506	4.87846	3.85462	20.788	22.1406	21.3106	3.01291	up
TraesCS7A03G0867900	473	621	398	117	73	42	6.22253	7.34759	5.85962	1.55444	0.798119	0.579879	-1.78248	down
TraesCS1B03G1070300	129	174	163	72195	62830	51755	1.12398	1.66984	1.52208	658.227	475.612	504.546	9.52986	up
TraesCS4A03G0124800	419	969	536	61	75	55	4.27497	8.89099	6.11754	0.624687	0.634383	0.589989	-2.4313	down
TraesCS7B03G0732100	0	9	12	8364	7865	6501	0	0.095956	0.16847	107.856	83.6496	88.3161	10.9406	up
TraesCS5A03G0919800	1536	2267	979	57307	47995	39599	13.5157	17.9493	9.63447	509.874	352.209	371.196	5.85044	up
TraesCS6B03G0315100	108	95	50	161	265	208	0.85472	0.681526	0.442621	1.29634	1.76304	1.76551	2.20613	up
TraesCS2D03G0174000	188	293	180	220	342	243	2.21779	3.10035	2.37184	2.61307	3.35933	3.05352	1.16327	up
TraesCS7A03G0882300	0	31	29	20484	22651	17470	0	0.296338	0.345398	222.098	202.565	199.562	10.8569	up
TraesCS1D03G0889300	97	207	252	77710	70664	54250	0.903428	1.73694	2.63451	733.82	550.369	539.728	9.36991	up
TraesCS6A03G0226100	128	139	123	568	652	454	0.930228	0.907786	1.00613	4.19425	3.96864	3.52818	2.96762	up
TraesCS5D03G0723300	595	534	353	3245	4297	3731	5.06394	4.08977	3.35962	27.9398	30.5179	33.8497	3.81317	up
TraesCS5D03G0879400	1216	2128	616	74543	58513	49644	10.3348	16.269	5.85752	640.473	414.665	449.389	6.48307	up
TraesCS7D03G0610900	46	52	42	12171	14568	11545	0.374479	0.40745	0.384997	103.314	101.909	103.649	8.97239	up
TraesCS6D03G0183900	39	51	30	91	94	81	0.305735	0.358584	0.256635	0.723883	0.618921	0.677927	2.0481	up
TraesCS2A03G0964500	0	16	12	9519	7891	7517	0	0.147695	0.14152	104.512	71.4543	86.9473	10.7155	up
TraesCS5D03G0566700	3726	4529	3977	7668	5859	5924	31.1858	34.1001	37.244	64.8619	40.8736	52.7957	1.56885	up
TraesCS2D03G0906200	5	13	12	10227	8884	8167	0.044877	0.111183	0.125626	98.2652	70.4057	82.6728	10.7253	up
TraesCS4B03G0653900	484	773	444	130	185	142	4.19846	6.03956	4.3152	1.13919	1.33741	1.31095	-1.00476	down
TraesCS3D03G0664900	569	675	698	2375	2806	2337	5.77784	6.16205	7.92167	24.3666	23.7439	25.2652	2.81756	up

## Sheet: WC vs. PC
Gene ID	WC1_Count	WC3_Count	WC2_Count	PC1_Count	PC2_Count	PC3_Count	WC1_FPKM	WC3_FPKM	WC2_FPKM	PC1_FPKM	PC2_FPKM	PC3_FPKM	log2FC	regulated
TraesCS2B03G0557700	499	928	527	96	163	227	3.76039	6.28921	4.44551	0.638048	1.29962	1.44281	-2.10027	down
TraesCS7A03G0867900	473	621	398	103	121	171	6.22253	7.34759	5.85962	1.19018	1.68594	1.90344	-2.02894	down
TraesCS1A03G0859800	228	439	399	66	24	138	1.97161	3.42164	3.87069	0.5056	0.215328	1.00592	-2.40385	down
TraesCS5A03G0919800	1536	2267	979	58	117	179	13.5157	17.9493	9.63447	0.445592	1.09266	1.33074	-3.83798	down
TraesCS3D03G0648100	558	645	306	202	119	202	8.37298	8.7067	5.13588	2.67528	1.89645	2.55462	-1.6483	down
TraesCS5D03G0879400	1216	2128	616	29	64	159	10.3348	16.269	5.85752	0.211041	0.577239	1.14043	-4.05296	down
TraesCS5D03G0566700	3726	4529	3977	1823	1108	2077	31.1858	34.1001	37.244	13.4971	9.85255	14.6978	-1.44085	down
TraesCS7D03G0866900	88	196	62	36	40	29	0.917527	1.83686	0.721283	0.33062	0.439146	0.248986	-1.77722	down
TraesCS3B03G0806900	872	887	598	249	224	259	13.2783	12.1458	10.1817	3.34535	3.61632	3.33508	-1.80509	down

## Sheet: WH vs. PH
Gene ID	WH1_Count	WH2_Count	WH3_Count	PH3_Count	PH1_Count	PH2_Count	WH1_FPKM	WH2_FPKM	WH3_FPKM	PH3_FPKM	PH1_FPKM	PH2_FPKM	log2FC	regulated
TraesCS4D03G0577700	160	288	202	551	552	323	1.47957	2.19329	1.96697	4.39703	4.5196	3.28745	1.13863	up
TraesCS6D03G0183900	91	94	81	48	52	22	0.723883	0.618921	0.677927	0.328069	0.366883	0.193289	-1.15894	down

## Sheet: PCH vs. PHH
Gene ID	PCH1_Count	PCH2_Count	PCH3_Count	PHH3_Count	PHH2_Count	PHH1_Count	PCH1_FPKM	PCH2_FPKM	PCH3_FPKM	PHH3_FPKM	PHH2_FPKM	PHH1_FPKM	log2FC	regulated
TraesCS7D03G0610900	7190	5377	8941	20141	18380	16044	56.5755	44.0916	80.011	166.835	175.112	143.895	1.74533	up
TraesCS5D03G0879400	21493	15301	20383	53202	45438	40866	170.665	124.196	184.431	444.685	438.104	370.26	1.70352	up
TraesCS4D03G0577700	1043	1530	720	215	180	208	8.91183	13.369	7.00913	1.93397	1.86082	2.02161	-1.97322	down
TraesCS1D03G0889300	25153	16354	32652	57679	52927	51244	219.508	145.895	324.697	529.853	560.862	510.273	1.52111	up
TraesCS2D03G0906200	4442	2235	3904	9402	8200	8430	39.4428	20.2872	39.5016	87.8817	88.4153	85.4085	1.71078	up
TraesCS5D03G0723300	2076	1809	2480	8022	8304	6171	16.5204	14.7171	22.4881	67.2058	80.251	56.0412	2.23787	up

## Sheet: WHH vs. PHH
Gene ID	WHH1_Count	WHH2_Count	WHH3_Count	PHH3_Count	PHH2_Count	PHH1_Count	WHH1_FPKM	WHH2_FPKM	WHH3_FPKM	PHH3_FPKM	PHH2_FPKM	PHH1_FPKM	log2FC	regulated
TraesCS6D03G0183900	294	181	197	84	36	68	2.34654	1.44455	1.71947	0.648075	0.322068	0.564653	-1.83672	down
TraesCS5D03G0723300	2450	2735	3138	8022	8304	6171	21.1227	23.5782	29.6091	67.2058	80.251	56.0412	1.4039	up

## Sheet: PH vs. PHH
Gene ID	PH1_Count	PH2_Count	PH3_Count	PHH1_Count	PHH2_Count	PHH3_Count	PH1_FPKM	PH2_FPKM	PH3_FPKM	PHH1_FPKM	PHH2_FPKM	PHH3_FPKM	log2FC	regulated
TraesCS4D03G0577700	554	325	550	208	180	215	4.52581	3.3232	4.38063	1.99549	1.83694	1.90947	-1.05014	down
TraesCS3D03G0648100	91	76	148	793	529	594	1.21927	1.26752	1.92186	12.5123	8.88415	8.6535	2.72377	up
TraesCS5D03G0723300	3661	4050	4466	6550	8793	8503	27.843	38.5495	33.1187	58.7143	83.8837	70.3299	1.09173	up
TraesCS2D03G0442700	482	364	373	1186	890	760	2.81535	2.61602	2.06899	8.81083	7.03004	4.88634	1.34975	up
TraesCS3B03G0806900	290	216	316	842	1080	1083	3.9385	3.66808	4.18212	13.4878	18.4157	16.0021	2.01292	up
TraesCS2D03G0174000	390	204	360	50	63	38	4.10606	2.68677	3.69406	0.620526	0.828921	0.430456	-2.37475	down

## Sheet: WH vs. WHH
Gene ID	WH1_Count	WH2_Count	WH3_Count	WHH1_Count	WHH2_Count	WHH3_Count	WH1_FPKM	WH2_FPKM	WH3_FPKM	WHH1_FPKM	WHH2_FPKM	WHH3_FPKM	log2FC	regulated
TraesCS3D03G0648100	181	181	153	291	351	512	2.72528	2.25176	2.43295	5.2376	5.96949	8.42755	1.52751	up
TraesCS2D03G0442700	369	651	338	487	806	1109	2.47764	3.55096	2.41927	3.95158	6.03067	7.95399	1.2253	up
TraesCS3B03G0806900	332	322	313	364	678	567	5.08757	4.06572	5.05832	6.65249	11.7123	9.48141	1.08824	up
TraesCS6D03G0183900	88	92	77	177	127	197	0.695669	0.598962	0.637959	1.67794	1.13875	1.70526	1.34852	up
TraesCS2D03G0174000	220	342	243	7	49	30	2.6031	3.34862	3.0437	0.091487	0.644059	0.376518	-2.63158	down
